1 **Manuscript Title**

2

3 **Orphan nuclear receptors Err2 and 3 promote a feature-specific terminal differentiation**  
4 **program underlying gamma motor neuron function and proprioceptive movement control**

5 Short Title

6 Err2/3 tune gamma motor neuron function underlying proprioceptive movement control

7 **Authors**

8 Mudassar N. Khan<sup>1,2\*</sup>, Pitchaiah Cherukuri<sup>1,2,8</sup>, Francesco Negro<sup>2,3</sup>, Ashish Rajput<sup>4,9</sup>, Piotr  
9 Fabrowski<sup>1,2</sup>, Vikas Bansal<sup>4,5</sup>, Camille Lancelin<sup>2</sup>, Tsung-I Lee<sup>2</sup>, Yehan Bian<sup>2,8</sup>, William P. Mayer<sup>6</sup>,  
10 Turgay Akay<sup>6</sup>, Daniel Müller<sup>1,2</sup>, Stefan Bonn<sup>4</sup>, Dario Farina<sup>7</sup>, Till Marquardt<sup>1,2\*\*</sup>.

11

12 **Affiliations**

13 <sup>1</sup>Interfaculty Chair for Neurobiological Research, RWTH Aachen University: Medical Faculty  
14 (UKA), Clinic for Neurology & Faculty for Mathematics, Computer and Natural Sciences, Institute  
15 for Biology 2, Worringer Weg 3, 52074 Aachen, Germany

16 <sup>2</sup>Developmental Neurobiology Laboratory, European Neuroscience Institute (ENI-G),  
17 Grisebachstraße 5, 37077 Göttingen, Germany

18 <sup>3</sup>Department of Clinical and Experimental Sciences, Università degli Studi di Brescia, Viale Europa  
19 11, 25123, Brescia, Italy

20 <sup>4</sup>University Medical Center Hamburg Eppendorf, Center for Molecular Neurobiology Hamburg  
21 (ZMNH), Institute of Medical Systems Biology, Falkenried 94, 20251 Hamburg, Germany

22 <sup>5</sup>Biomedical Data Science and Machine Learning Group, German Center for Neurodegenerative  
23 Diseases, Tübingen 72076, Germany

24 <sup>6</sup>Atlantic Mobility Action Project, Brain Repair Centre, Department of Medical Neuroscience,  
25 Dalhousie University, Halifax, Nova Scotia, Canada

26 <sup>7</sup>Department of Bioengineering, Imperial College London, Royal School of Mines, London, UK

27 <sup>8</sup>SRM University Andhra Pradesh, Mangalagiri -Mandal, Neeru Konda, Amaravati, Andhra Pradesh  
28 522502, India email id: [pitchaiah.c@srmmap.edu.in](mailto:pitchaiah.c@srmmap.edu.in)

29 <sup>9</sup>Maximon AG, Bahnhofplatz, 6300 Zug, Switzerland

30

31 \*Correspondence: [Khan@fmp-berlin.de](mailto:Khan@fmp-berlin.de)

32 \*\*Co-correspondence: [tmarquardt@ukaachen.de](mailto:tmarquardt@ukaachen.de)

### 33 **Abstract**

34 Motor neurons are commonly thought of as mere relays between the central nervous system and the  
35 movement apparatus, yet, in mammals about one-third of them function exclusively as regulators of  
36 muscle proprioception. How these gamma motor neurons acquire properties to function differently  
37 from the muscle force-producing alpha motor neurons remains unclear. Here, we found that upon  
38 selective loss of the orphan nuclear receptors *Err2* and *Err3* (*Err2/3*) in mice, gamma motor neurons  
39 acquire characteristic structural (e.g. synaptic wiring), but not functional (e.g. physiological firing  
40 rates) properties necessary for regulating muscle proprioception, thus disrupting gait and precision  
41 movements *in vivo*. Moreover, *Err2/3* operate via transcriptional activation of neural activity  
42 modulators, one of which (*Kcna10*) promoted gamma motor neuron functional properties. Our work  
43 identifies a long-sought mechanism specifying gamma motor neuron properties necessary for  
44 proprioceptive movement control, which implies a ‘feature-specific’ terminal differentiation  
45 program implementing neuron subtype-specific functional but not structural properties.

46

### 47 **Summary**

48 The transcription factors *Err2* and *3* promote functional properties in a subset of motor neurons  
49 necessary for executing precise movements.

50

### 51 **Introduction**

52 Motor neurons tend to be thought of as passive links between the central nervous system and the  
53 movement apparatus by faithfully relaying descending neural commands to the skeletal musculature,  
54 where these signals evoke muscle contractions and thereby movement<sup>1</sup>. However, in zebrafish,  
55 motor neurons have been shown to provide active and direct feedback control for the neural  
56 networks driving rhythmic (swimming) locomotion<sup>2</sup>. In mammals, moreover, up to a third of the  
57 motor neurons do not connect to the force-generating extrafusal skeletal muscle fibers and do not  
58 directly contribute to muscle contractions<sup>3-5</sup>. Rather, these neurons, called gamma motor neurons,  
59 effectively contribute to the ability of mammals to learn and execute precision movements<sup>6, 7</sup>.

60 Gamma motor neurons do so by regulating the flow of proprioceptive information the nervous  
61 system receives about skeletal muscle (and thus limb and trunk) position and velocity<sup>8-11</sup> via direct  
62 synaptic connections onto the intrafusal fibers of stretch-sensitive mechanosensory organs called  
63 muscle spindles<sup>3-6</sup>. These motor neurons thereby facilitate ‘real-time’ adaptations of movements to  
64 changing external conditions by enhancing detection of discrepancies from intended movement  
65 trajectories<sup>6, 7, 12</sup>. In addition, gamma motor neurons<sup>6</sup> generate muscle tone by recruiting the force-  
66 generating (alpha) motor neurons through a monosynaptic spindle afferent feedback ‘servo’ loop,  
67 thus assisting movement initiation and postural control<sup>6</sup>.

68

69 The ability of gamma motor neurons to control muscle proprioception entails their acquisition of  
70 intrinsic functional properties distinguishing them from the muscle force-generating alpha motor  
71 neurons<sup>13</sup>. For instance, their low firing thresholds and ability to rapidly gear up high firing rates  
72 appear to be exquisitely suited for achieving near-instant intrafusal fiber tension for maintaining or  
73 modulating muscle spindle dynamic range<sup>6, 13</sup>. Another feature allowing gamma motor neurons to  
74 effectively control muscle proprioception is their lack of monosynaptic (Ia) afferent feedback, which  
75 uncouples them from potential ‘short circuits’ by their own actions on muscle spindle activity<sup>14, 15</sup>.  
76 The acquisition of such specific combinations of functional (activation threshold, firing rate etc.)  
77 and structural properties (soma size, synaptic wiring preference etc.) inherent to neuron type or  
78 subtype identity<sup>16</sup> is thought to involve overarching terminal differentiation (‘selector’) gene  
79 expression programs<sup>17, 18</sup>. Nevertheless, terminal differentiation programs have also been shown to  
80 promote only some but not all neuron subtype-specific structural features, like axonal versus  
81 dendritic wiring specificity<sup>19</sup>, raising the possibility that at least in some instances neuron type or  
82 subtype-specific properties could be specified by such programs in a modular (‘feature-specific’)  
83 manner.

84

85 Apart from their overall distinction from the gamma motor neurons, alpha motor neurons  
86 themselves exhibit a range of functional properties important for the adjustment of muscle force<sup>20</sup>.  
87 We and others have previously reported mechanisms underlying the diversification of alpha motor  
88 neurons proper, which involved both cell-autonomous actions by the non-canonical Notch ligand  
89 Dlk1<sup>21</sup>, as well as non-cell autonomous signals by region-specific astrocytes<sup>22</sup>. Yet, how gamma  
90 motor neurons acquire a unique suite of properties that allow them to control muscle proprioception,  
91 instead of generating muscle force, remained unaddressed. Here, we studied the specification of  
92 gamma versus alpha motor neurons in mice and identify the orphan nuclear receptors Err2 and Err3  
93 as drivers of a ‘feature-specific’ terminal differentiation program underlying the acquisition of  
94 gamma motor neuron-specific functional but not structural properties required for proprioceptive  
95 movement control.

96

97

98

99

100

101

102

## 103 **Results**

### 104 **Electrophysiological characterization of murine gamma motor neurons**

105 Since the last recordings from mature gamma motor neurons dated from 1978 in the cat<sup>13</sup>, we first  
106 sought to establish a baseline for gamma motor neuron functional properties in the mouse. We were  
107 aided in this by a fortuitous finding that allowed us to selectively record gamma motor neurons in  
108 the mouse spinal cord based on the relative efficacy of retrograde Fluoro-Gold uptake (Figures 1A,  
109 1B and S5A-S5G). We observed that indeed gamma motor neurons can be distinguished from alpha  
110 motor neurons based on their FG uptake as FG<sup>high</sup> lacked sensory neuron innervations and expressed  
111 low or negligible levels of NeuN when compared to FG<sup>low</sup> motor neurons (Figure 1B). Upon  
112 performing whole cell patch-clamp recordings at 20-22 days postnatally, we observed that the small-  
113 soma motor neurons with high-levels of Fluoro-Gold retention (FG<sup>high</sup>) exhibited an  
114 electrophysiological signature matching that previously reported for cat gamma motor neurons<sup>13</sup>  
115 (Figures 1C-1E). The FG<sup>high</sup> motor neurons showed a distinctive combination of lower rheobases  
116 with higher firing frequencies and gains, as well as higher instantaneous and steady-state firing rates  
117 when compared to the larger (FG<sup>low</sup>) motor neuron subtypes (Figures 1D, 1E and S6A and S6B and  
118 Supplementary Table S1). In contrast, FG<sup>low</sup> motor neuron subtypes were characterized by a  
119 combination of low rheobases with low firing rates (alpha or beta motor neurons)<sup>20</sup> (Figures 1D, 1E  
120 and S6A and S6B and Supplementary Table S1). Moreover, FG<sup>high</sup> motor neurons showed  
121 significantly lower membrane input resistance, higher membrane capacitance and lower AHP-decay  
122 times when compared to FG<sup>low</sup> motor neurons (Figures 1E and S6C and Supplementary Table S1).  
123 In addition to the overall quantitative differences in functional properties, gamma motor neurons in  
124 mouse as in the cat<sup>13,20</sup> further showed a distinctive combination of functional properties (e.g.:  
125 relatively very low activation thresholds + very high firing rates), compared to those of the slow  
126 (low thresholds + low firing rates) or fast alpha motor neuron subtypes (high thresholds + high  
127 firing rates).

128

### 129 **Correlated expression of orphan nuclear receptors Err2 and Err3 by gamma motor neurons**

130 It had previously been established that the survival of gamma motor neurons beyond the early  
131 postnatal period relies on signals released by muscle spindles<sup>23,24</sup>, which, in addition to the  
132 discovery of markers allowing *in situ* detection of gamma motor neurons<sup>23,24</sup> provided us with entry  
133 points for studying mechanisms underlying the diversification of motor neurons into alpha and  
134 gamma subtypes. We focused on the estrogen-related receptor (Err) subfamily of orphan nuclear  
135 receptors, which primarily function as ligand-independent transcription factors<sup>25</sup>, because of their  
136 contribution to cell type-specific functional (i.e.: electrophysiological) properties in other contexts<sup>25</sup>  
137 and because of the previously reported expression of Err3 by gamma motor neurons<sup>24</sup>. We further

138 found that the closely related Err3 paralogue Err2, with which it shares virtually the same DNA  
139 binding sequences<sup>25</sup>, was co-expressed with Err3 by gamma motor neurons (Figures 2A-2J and  
140 S2A-S2O) upon immunodetection using antibodies specifically recognizing either Err2 or Err3  
141 (Figures S1A-S1Q), a co-expression which had been independently observed by others using single-  
142 cell RNAseq<sup>26</sup>. Through deeper analysis by quantitative immunodetection we indeed found high  
143 levels of correlated expression (Pearson correlation,  $r=0.86$ ) of both Err2 and Err3 by motor neurons  
144 with relatively small somas characteristic for gamma motor neurons<sup>27</sup> and low or negligible levels of  
145 the alpha motor neuron marker NeuN<sup>23, 24</sup> (NeuN<sup>low or negligible</sup>) (Figures 2A-2J and S2A-S2O). The  
146 small-soma Err2/3<sup>high</sup> NeuN<sup>low or negligible</sup> motor neurons lacked vGlut+ varicosities on somatic or  
147 dendritic membranes (Figures 1B, 2L), indicating absence of monosynaptic spindle afferent input, a  
148 defining characteristic of gamma motor neurons<sup>14, 15, 23, 24</sup>. Similar to Err3, Err2 was initially broadly  
149 expressed by most motor neurons during embryonic development (Figures S3A-S3C), but high Err2  
150 levels became increasingly confined to gamma motor neurons during the first two postnatal weeks  
151 (Figures S3D-S3R). Consistent with the dependency of gamma motor neuron maintenance on  
152 spindle-derived signals<sup>23, 24</sup>, adult motor neurons failed to retain high levels of both Err2/3 in Egr3-  
153 deficient mice with impaired muscle spindle development (Figures 2K, S3S-S3X and S3S'-S3X').  
154 We noted that low Err2/3 levels were maintained by the remaining large-soma size NeuN<sup>high</sup> motor  
155 neurons in Egr3-deficient mice (Figures S3S'-S3X'), while high Err2/3 levels persisted in a subset  
156 of ventral spinal interneurons in both Egr3-deficient mice (Figures S3S'-S3X') and mice specifically  
157 lacking Err2/3 in motor neurons (Figure S1O-S1Q). Furthermore, *Imaris* reconstruction studies in  
158 control mice showed that indeed, FG<sup>high</sup>, Err2<sup>high</sup>, NeuN<sup>low or negligible</sup> gamma motor neurons were  
159 contacted by few vGlut1<sup>+</sup> terminals, while FG<sup>low</sup>, Err2<sup>low or negligible</sup>, NeuN<sup>high</sup> alpha motor neuron  
160 somas were covered with vGlut1<sup>+</sup> varicosities (Figures 2L-2N). Mouse gamma motor neurons thus  
161 exhibit high levels of correlated Err2 and Err3 expression.

162

### 163 **Err2/3 are required for the acquisition of gamma motor neuron electrophysiological** 164 **properties**

165 Due to their correlated expression as well as their molecular similarity, we next asked whether  
166 Err2/3 would contribute to gamma versus alpha motor neuron functional diversification by  
167 selectively inactivating both *Esrrb* and *Esrrg* genes in motor neurons via Cre-mediated  
168 recombination in cholinergic neurons in *Esrrb*<sup>flox/flox</sup>; *Esrrg*<sup>flox/flox</sup>; *Chat*<sup>Cre</sup> (Err2/3<sup>cko</sup>) mice (Figures  
169 S1O-S1Q). Because *Chat*<sup>Cre</sup>-mediated recombinase activity overlapped with endogenous Err2/3  
170 expression in motor neurons but not in other cholinergic neuron types throughout the nervous  
171 system (Figures S4A-S4D), we concluded that Err2/3<sup>cko</sup> mice permitted addressing Err2/3 function  
172 in motor neurons. Whole cell patch-clamp recordings performed in 20-22 days-old Err2/3<sup>cko</sup> mice  
173 showed that most FG<sup>high</sup> motor neurons failed to acquire a gamma motor neuron

174 electrophysiological signature and instead shifted their properties dramatically towards resembling  
175 those of FG<sup>low</sup> alpha motor neurons, with significantly elevated rheobases, as well as lowered gains  
176 and firing rates (Figures 3A, 3B and 3C, and S6D-S6H and Supplementary Table S1). At the same  
177 time, we did not observe significant changes in the properties of FG<sup>low</sup> alpha motor neurons in  
178 *Err2/3<sup>cko</sup>* mice when compared to control mice (Figures 3D, 3E and 3F and S6I-S6M and  
179 Supplementary Table S1). *Err2/3* thus appear to be prerequisite for the acquisition of gamma motor  
180 neuron functional properties, but not for the development of morphologically distinguishable  
181 gamma motor neurons proper.

182

### 183 ***Err2/3*-dependent gamma motor neuron functional properties are required for movement** 184 **accuracy**

185 The biophysical properties of gamma motor neurons are thought to be exquisitely suited to effect  
186 instant intrafusal fiber peak tension for maintaining and modulating spindle dynamic range and thus  
187 muscle proprioception<sup>13</sup>. We therefore asked how a shift towards an alpha motor neuron-like  
188 electrophysiological signature in gamma motor neurons would impact movements relying on  
189 proprioceptive feedback from muscles. Because of the exclusive association of high *Err2/3* levels  
190 with gamma motor neurons, and the lack of a significant impact of *Err2/3* loss on other motor  
191 neuron subtypes, we predicted that beta motor neuron function would be preserved in *Err2/3<sup>cko</sup>*  
192 mice, thus allowing us to study the contribution of gamma motor neuron function to movement  
193 control in the otherwise intact animal. Similar to *Egr3*-deficient mice<sup>9,10</sup>, *Err2/3<sup>cko</sup>* mice exhibited  
194 marked postural and gait alterations, including changes in metrics related to foot placement, weight  
195 bearing, stride, stance, braking and propulsion (Figures 4A, 4B, S8D and S8E), consistent with the  
196 predicted contributions of gamma motor neuron-assisted spindle function to posture, gait phase-  
197 transitions and force generation during locomotion<sup>6,9-11</sup>. *Err2/3<sup>cko</sup>* mice were nevertheless able to  
198 sustain the same range of speeds as control mice in a treadmill locomotion task with little  
199 dependency on muscle proprioception<sup>9,10</sup> (Figures S8A-S8C). However, *Err2/3* loss from motor  
200 neurons triggered a failure to handle precision tasks with extensive reliance on muscle  
201 proprioception<sup>9,10</sup>, such as navigating a narrow horizontal beam (Figures 4C, 4D and Supplementary  
202 Movies S1 and S2) or a horizontal ladder (Figures 4E, 4F and Supplementary Movies S3 and S4),  
203 indicating that the electrophysiological signature implemented by *Err2/3* in gamma motor neurons is  
204 prerequisite for effective modulation of muscle proprioception, and thereby the execution of  
205 precision movements. To further test this idea, we recorded spindle afferent responses via suction  
206 electrodes in nerve-muscle preparations<sup>31</sup> derived from *Err2/3<sup>cko</sup>* or control mice. In these  
207 preparations muscle stretch applied by a force transducer elicited similar Ia afferent responses in  
208 *Err2/3<sup>cko</sup>* and control mice (Figures 4G, 4G' and S7A-S7D), consistent with the morphologically  
209 normal spindle assembly in these animals (Figures 5K and S7G, S7H). In contrast to control

210 spindles (Figures S7A and S7B), however,  $Err2/3^{cko}$  spindle afferents frequently exhibited reduced  
211 firing rates at muscle resting length (Figures 4H, 4H' and S7C, S7D), possibly due to a decrease in  
212 basal intrafusal fiber contractility caused by chronic disruption of gamma motor neuron input. The  
213  $Err2/3$ -dependent implementation of gamma motor neuron functional properties therefore appears to  
214 be prerequisite for regulating spindle-mediated muscle proprioception and movement control.

215

### 216 **Lack of $Err2/3$ in gamma motor neurons does not alter their development and connectivity** 217 **patterns**

218 Since we observed that the loss of  $Err2/3$  in gamma motor neurons in  $Err2/3^{cko}$  mice led to the loss  
219 of a gamma motor neuron electrophysiological identity, including low rheobases, high firing  
220 frequencies and gains, we then asked whether  $Err2/3$  are necessary for gamma motor neuron  
221 morphology and connectivity. In addition to electrophysiological features, gamma motor neurons  
222 characteristically possess small soma sizes, lack Ia sensory neuron pre-synaptic innervation and  
223 send axons that innervate muscle spindle intrafusal fibers<sup>24,27</sup>. Remarkably, the lack of  $Err2/3$  in  
224  $Err2/3^{cko}$  mice did not affect the development of small-soma  $FG^{high}$  and  $NeuN^{low}$  or negligible motor  
225 neurons (Figures S3D-S3R). Similar to control mice (Figures 5E, 5F and 5I), the small-soma  $FG^{high}$ ,  
226  $Err2^{-}$ ,  $NeuN^{low}$  or negligible motor neurons in  $Err2/3^{cko}$  mice (Figures 5G, 5H and 5I) lacked  $vGlut1^{+}$   
227 varicosities on somatic or dendritic membranes. Moreover,  $FG^{low}$ ,  $Err2^{-}$ ,  $NeuN^{high}$  motor neurons  
228 retained their  $vGlut1^{+}$  terminals in both  $Err2/3^{cko}$  mice (Figures 5C, 5D and 5I) when compared to  
229 control mice (Figures 5A, 5B and 5I). We next observed the morphology of the muscle spindles.  
230 The muscle spindle appearance, notably the innervation by motor axon presynaptic termini within  
231 the peripheral contractile segments of the intrafusal muscle fibers was preserved in  $Err2/3^{cko}$  muscle  
232 spindles (Figures 5K) when compared to control mice (Figures 5J). Taken together, we surmise that  
233  $Err2/3$  are not necessary for gamma motor neuron structural identity, since the lack of  $Err2/3$  in  
234 gamma motor neurons did not affect the development of morphologically distinct gamma motor  
235 neurons and did not perturb gamma motor neuron pre- and post-synaptic innervation patterns in  
236  $Err2/3^{cko}$  mice.

237

### 238 **$Err2/3$ are sufficient in forcing gamma motor neuron functional properties in chick**

239 We next tested whether  $Err2/3$  would also be sufficient to promote a gamma motor neuron  
240 electrophysiological signature by performing whole cell patch-clamp recordings on chick motor  
241 neurons<sup>21</sup> engineered to stably express elevated  $Err2/3$  levels (Figures 6A-6D'). Indeed, forced  
242 expression of  $Err2/3$  partially shifted motor neuron properties towards an electrophysiological  
243 signature recapitulating that of mouse or cat gamma motor neurons<sup>13,20</sup>, including a combination of  
244 high gains and firing rates (Figures 6E-6I, S6N and Supplementary Table S2), suggesting that high

245 Err2/3 levels are not only necessary but also sufficient to promote a gamma motor neuron  
246 electrophysiological signature. This effect on motor neuron properties was enhanced by fusing Err2  
247 to the heterologous transcriptional activation domain VP16 (Figures 6G-6I, S6N and Supplementary  
248 Table S2), but not by its fusion to the *engrailed* transcriptional repressor domain (EnR) (Figures 6G-  
249 6I, S6N and Supplementary Table S2), suggesting that in this context Err2 primarily functions as a  
250 transcriptional activator. Thus, Err2/3 appear to be not only necessary but also sufficient to promote  
251 gamma motor neuron functional properties by operating as transcriptional activators.

252

### 253 **Err2/3 drive gamma motor neuron functional properties by activating the expression of the** 254 **shaker K<sup>+</sup> channel subunit gene *kcnal0***

255 Reasoning that in these gain-of-function experiments in chick, Err2 would likely operate through the  
256 same intermediate factors through which it would normally tune motor neuron electrophysiological  
257 properties, we performed comparative transcriptome profiling by RNA sequencing of chick motor  
258 neurons forcedly expressing Err2 (Figures 7A and S9G-S9J, Supplementary Table S3). In these  
259 experiments, elevated Err2 levels significantly activated a set of genes largely distinct from the gene  
260 signature activated by the previously identified (fast) alpha motor neuron determinant *Dlk1*<sup>21</sup>  
261 (Figures 7A and S9G-S9J, Supplementary Table S3). This included activation by Err2 of *Kcnal0*,  
262 which encodes a member of the shaker family of voltage-gated K<sup>+</sup> channels implicated in neuronal  
263 excitability<sup>29</sup> (Figures 7A and S9H), the promoter of which contained an evolutionary conserved  
264 region (ECR) with three clustered Err2/3 DNA binding motifs (Figures 7B and S9K). In chick  
265 motor neurons, moreover Err2 boosted reporter gene activity driven by the *Kcnal0* ECR (Figures  
266 7C, S9C and S9D), but not upon introducing mutations into the ECR's Err2/3 binding motifs  
267 (Figures 7B, 7C, S9E and S9F). Ultimately, similar to *Err2*, forced expression of *Kcnal0* shifted  
268 motor neuron electrophysiological properties towards lower rheobases and higher firing rates typical  
269 for gamma motor neurons (Figure 7D and Supplementary Table S2), together suggesting that  
270 Err2/3, like *Dlk1*<sup>21</sup> or *Islet* in *Drosophila*<sup>30</sup>, chiefly operate through voltage-gated K<sup>+</sup> channels to  
271 promote neuron subtype-specific electrophysiological properties (Figure 7E). Taken together, these  
272 data suggest that Err2/3 operate as transcriptional activators to implement a feature-specific gene  
273 expression program encoding neural activity modulators to promote gamma motor neuron  
274 functional but not structural properties.

275

### 276 **Discussion**

277 Neuronal specification is thought to involve gene expression programs that coordinate the  
278 acquisition of both functional (activation threshold, firing rate etc.) and structural properties (soma  
279 size, synaptic wiring preference etc.) associated with neuron type or subtype identities<sup>16-18</sup>. Here, we



280 have shown that during the diversification of motor neurons into gamma and alpha subtypes, the  
281 acquisition of neuron subtype-specific functional properties can (at least to a large degree) be  
282 achieved independently from the acquisition of structural properties (Figure 7E). The disruption of  
283 proprioceptive movement control we observed upon eliminating gamma motor neuron-specific  
284 functional (but not structural) properties therefore suggests that homeostatic plasticity, which to  
285 some extent can compensate for quantitative fluctuations in neural activity<sup>28</sup>, is unable to offset a  
286 qualitative shift in the biophysical properties of one neuron subtype towards those of another. Since  
287 the ‘feature-specific’ action of *Err2/3* in specifying neuron subtype-specific properties is apparently  
288 important for the function of the entire neural network involved in muscle spindle-dependent  
289 movement control, it will be interesting to determine whether a similar separation of functional and  
290 structural terminal differentiation programs exists elsewhere in the mammalian nervous system.  
291 This, in turn, would open the intriguing possibility of utilizing ‘feature-specific’ terminal  
292 differentiation factors as indicators for a certain set of biophysical properties (i.e.: as ‘markers for  
293 neuronal function’), instead of as markers for neuron type or subtype identities proper.

294  
295 Two types of gamma motor neuron output, static or dynamic, are thought to normally tune muscle  
296 spindle sensitivity during different movement tasks<sup>6,33</sup>. Three observations led us to conclude that  
297 the actions of *Err2/3* do not distinguish between both types of gamma motor neuron output. First,  
298 we found *Err2/3* to be broadly expressed by all gamma motor neurons. Second, consistently, gamma  
299 motor neuron biophysical properties were disrupted as a whole upon loss of *Err2/3*. Third, the range  
300 of movements affected by *Err2/3* removal from motor neurons (from running to ‘skilled’ movement)  
301 further suggest that *Err2/3* function would be required for both static and dynamic modulation of  
302 spindle function. The mechanistic bases underlying the two different outputs of gamma motor  
303 neurons to spindles thus remain to be addressed. How about the beta motor neurons? Beta motor  
304 neurons connect to both extrafusal and intrafusal muscle fibers but are otherwise morphologically  
305 indistinguishable from alpha motor neurons<sup>34-36</sup>. Since beta motor neurons, like the alpha motor  
306 neurons, possess relatively large soma sizes and receive monosynaptic Ia afferent input<sup>36</sup>, we were  
307 able to rule out that *Err2/3* were also operating in beta motor neurons. Since beta motor neurons so  
308 far have mostly been studied in the cat, and have been identified solely based on their simultaneous  
309 innervation of intrafusal and extrafusal fibers<sup>34-36</sup>, both the prevalence of beta motor neurons and  
310 their significance for movement control in rodents awaits further study.

311  
312 The remarkable contribution of a subset of motor neurons to proprioceptive movement control in  
313 mammals has long been recognized<sup>4-6</sup>, but in over 75 years since the description of gamma motor  
314 neurons, little has been learned about how these neurons acquire properties that allow them to  
315 function differently from the force-generating motor neurons in the first place. In the present study,

316 we identified a long-sought mechanism driving the functional divergence of gamma and alpha  
317 motor neurons, by showing that the orphan nuclear receptors Err2/3 implement a ‘feature-specific’  
318 terminal differentiation program promoting the acquisition of gamma motor neuron functional  
319 properties (Figure 7E). These properties, in turn, allow the nervous system to engage muscle  
320 spindles for regulating muscle proprioception and thus movement accuracy. The action of Err2/3 in  
321 gamma motor neuron functional specification could ultimately serve as a blueprint for how such  
322 feature-specific terminal differentiation programs impart either functional or structural properties  
323 elsewhere in the nervous system.

324

## 325 **Experimental Procedures**

### 326 **Mouse models**

327 Mouse husbandry and experiments involving mice were approved by and conformed University,  
328 state, federal and European Union animal welfare regulations. For experiments using wild-type  
329 mice, C57BL/6J and CD1 strains (both purchased from Charles River Laboratories, Inc.,  
330 Wilmington, USA) were used. “*Chat::tdTomato*” mice were generated by interbreeding mice  
331 carrying “*Rosa26<sup>flx/tdTomato</sup>*”<sup>37</sup> and “*Chat<sup>Cre</sup>*”<sup>38</sup> targeted alleles (both purchased from Jackson  
332 Laboratories, Bar Harbor, USA ). *Egr3<sup>ko/ko</sup>* mice<sup>39</sup> were a gift from Warren G. Tourtellotte  
333 (Northwestern University, currently Cedars Sinai Medical Center). *Err2/3<sup>cko</sup>* (*Esrrb<sup>flx/flx</sup>*;  
334 *Esrrg<sup>flx/flx</sup>*; *Chat<sup>Cre</sup>*) mice were obtained by interbreeding mice carrying *Chat<sup>Cre</sup>* and floxed  
335 *Esrrb<sup>loxP/loxP</sup>* (exon 2 of *Esrrb* gene (chromosome 12) has been flanked by two loxP sites)<sup>40</sup> alleles  
336 with mice carrying floxed *Esrrg<sup>loxP/loxP</sup>* (in which exon 2 of *Esrrg* gene (chromosome 1) has been  
337 flanked by two *loxP* sites alleles, and were derived from the ES cell repository of the Institut  
338 Clinique de la Souris (ICS), Alsace, France). Unless otherwise indicated, “controls” for comparison  
339 with *Err2/3<sup>cko</sup>* mice were of the genotype *Esrrb<sup>flx/flx</sup>*; *Esrrg<sup>flx/flx</sup>* (unrecombined alleles) and  
340 *Egr3<sup>ko/+</sup>* or C57bl6/J (wild type) mice for comparison with *Egr3<sup>ko/ko</sup>* mice.

341

### 342 **Immunodetection**

343 30-60 µm frozen OCT (Sakura Finetek GmbH, Umkirch, Germany) sections were incubated  
344 overnight in PBS containing 1% BSA and 0.5% Triton-X 100 as described<sup>41-43</sup>, using the following  
345 antibodies: mouse anti-NeuN (1:1500, Cat. # MAB377, Merck KGaA, Darmstadt, Germany), chick  
346 anti-GFP (1:2000, Cat. # ab13970, Abcam plc., Cambridge, UK), rabbit anti-dsRed (1:1000, Cat. #  
347 632496, Takara Bio Europe SAS, Saint-Germain-en-Laye, France), mouse anti-Err2 IgG2b (1:4000,  
348 Cat. # PP-H6705-00, R&D Systems Inc., Minneapolis, USA), mouse anti-Err3 IgG2a (1:1000, Cat.  
349 # PP-H6812-00, R&D Systems Inc., Minneapolis, USA), rabbit anti-VACHT (1:750, Cat. # 139103,  
350 Synaptic Systems GmbH, Göttingen, Germany), guinea pig anti-VGLUT1 (1:1000, Cat. # AB5905,

351 Merck KGaA, Darmstadt, Germany), rabbit anti-Isl1/2 (1:2500, Gift from S. L. Pfaff, Salk Institute  
352 La Jolla, CA USA), mouse anti-V5 (1:1000, Cat. # 37-7500, Thermo Fisher Scientific Inc.,  
353 Waltham, USA). Secondary detection of anti-Err2 and anti-Err3 IgG isoforms was accomplished by  
354 Alexa Fluor-conjugated anti-mouse IgG2a (1:2000, Cat. # A-21131, Thermo Fisher Scientific Inc.,  
355 Waltham, USA) or IgG2b (1:2000, Cat. # A-21147, Thermo Fisher Scientific Inc., Waltham, USA)  
356 antibodies.

357

### 358 **Microscopy, image analysis and quantification**

359 Fluorescence microscopy was performed using Zeiss LSM 710 and LSM 800 laser scanning  
360 microscopes. 6-28 optical sections were obtained at a step-size of 0.8-1.5  $\mu\text{m}$ . Care was applied to  
361 avoid oversaturation and distortion of relative expression levels during image acquisition. Raw  
362 images were imported into ImageJ and z projected at maximum intensity. For quantification of  
363 expression levels raw pixel intensities were quantified in individually outlined motor neuron nuclei  
364 “region of interests” (ROIs) using Adobe Photoshop CS5.1. using background levels and the neuron  
365 with the highest fluorescent intensity for normalization. For quantification of VGLUT1<sup>+</sup> varicosities,  
366 a step-size of 0.80  $\mu\text{m}$  was used to obtain an average of 20 optical sections. Raw Z-stack Carl Zeiss  
367 files (.czi) were imported into *Imaris 8.0* (Bitplane AG, Zurich, Switzerland). Neuronal surfaces  
368 were rendered to detect vGlut1 varicosities (“spots”) on motor neuron somas and dendrites using the  
369 “find spots close to surface” function<sup>44</sup> and guided by specific parameters<sup>24</sup>.

370

### 371 **Electrophysiology of gamma vs. alpha/beta motor neurons in mice**

372 Mice (P20-22) were intraperitoneally injected with 0.5%-2% (w/v) FluoroGold (FG, Flurochrome  
373 LLC., Denver, CO) dissolved in PBS (pH=7.2) at a volume of 0.10 ml/10 g body weight. The  
374 animals (1-day post-FG injection) were intraperitoneal injected with 100 mg/kg body weight of  
375 Ketamine, 20 mg/kg body weight Xylazine in PBS pH=7.2 at a volume of 0.10 ml/10 g of body  
376 weight. After losing their righting reflex, they were placed on a bed of ice until loss of toe pinch  
377 response. Immediately after, the animals were decapitated and quickly eviscerated. The torso was  
378 placed in chilled Dissecting aCSF (DaCSF) solution (in mM): 191 sucrose, 0.75 K-gluconate, 1.25  
379  $\text{KH}_2\text{PO}_4$ , 26 choline bicarbonate (80% solution), 4  $\text{MgSO}_4$ , 1  $\text{CaCl}_2$ , 20 dextrose, 2 kynurenic acid,  
380 1 (+)-sodium L-ascorbate, 5 ethyl pyruvate, 3 myo-Inositol. The solution was maintained at pH ~7.3  
381 using carbogen (95%  $\text{O}_2$ -5%  $\text{CO}_2$ ), and osmolarity was adjusted to ~305-315 mOsm with sucrose.  
382 Vertebratomy was performed to extract the spinal cord. Ventral roots were cut and the meninges  
383 were removed from the spinal cord. The thoracolumbar region (T10-L5) of the spinal cord was  
384 isolated and embedded in agar block (4% agar in Recording aCSF (RaCSF)) using 20% gelatin in  
385 RaCSF). Slices (370  $\mu\text{m}$ ) were obtained using Leica VT1200 S (Leica Biosystems, GmbH,

386 Nussloch Germany). The slices were incubated in 35°C RaCSF for 30 minutes and 30 minutes at  
387 room temperature before the recordings. Motor neurons (MNs) were recorded in the RaCSF solution  
388 (mM): 121 NaCl, 3 KCl, 1.25 NaH<sub>2</sub>PO<sub>4</sub>, 25 NaHCO<sub>3</sub>, 1.1 MgCl<sub>2</sub>, 2.2 CaCl<sub>2</sub>, 15 dextrose, 1 (+)-  
389 sodium L-ascorbate, 5 ethyl pyruvate, 3 *myo*-Inositol. The solution was maintained at pH ~7.4 using  
390 carbogen (95% O<sub>2</sub>-5% CO<sub>2</sub>), and osmolarity was adjusted to ~305-315 mOsm with sucrose. Whole  
391 cell patch-clamp recordings were performed from FG-labeled motor neurons in the ventral horn  
392 from control and *Err2/3<sup>cko</sup>* animals. FG<sup>high</sup> and FG<sup>low</sup> MNs were visually identified using Olympus  
393 BX51W1 microscope (Olympus Europa SE & Co. KG, Hamburg, Germany) equipped with an FG  
394 longpass filter set (350nm bandpass and 425nm longpass filter) (AHF analysentechnik AG,  
395 Tübingen Germany). The patch pipette (resistances of 3-6 MΩ) was filled with intracellular solution  
396 (mM): 131 K-methanesulfonate (or MeSO<sub>3</sub>H), 6 NaCl, 0.1 CaCl<sub>2</sub>, 1.1 EGTA-KOH, 10 HEPES, 0.3  
397 MgCl<sub>2</sub>, 3 ATP-Mg<sup>2+</sup> salt, 0.5 GTP-Na<sup>+</sup> salt, 2.5 L-glutathione reduced, 5 phosphocreatine di(tris)  
398 salt. The solution pH was adjusted to 7.25 with KOH and the osmolarity was adjusted to 300 mOsm  
399 using sucrose. Data analysis was performed offline using Axograph X Version 1.6. Previously  
400 established protocols were applied to obtain membrane properties of rheobase, input resistance,  
401 capacitance, *F-I* curve, AHP amplitude, half-width and half-decay times<sup>21, 45-48</sup>. For obtaining the *F-I*  
402 curve for discharge properties, spikes were elicited by applying 20 pA, 1000 ms square current  
403 pulses to cells. Currents up to 1 nA were injected for all neurons. For the mouse recordings, currents  
404 of up to 1 nA were injected into FG<sup>high</sup> and 3 nA into FG<sup>low</sup> MNs from control and *Err2/3<sup>cko</sup>* spinal  
405 cord slices. The firing frequency (Hz) was defined as the inverse of the duration between first two  
406 spikes (instantaneous firing frequency), or 0.25-0.75 seconds of the current pulse (steady-state firing  
407 frequency), or 1 second current pulse (mean firing frequency). The gain (Hz/nA) was defined as the  
408 slope of the regression line of mean firing frequency upon current injection<sup>49,65</sup>.

409

#### 410 **Gait analysis**

411 Control (n =9) and *Err2/3<sup>cko</sup>* (n=8) mouse locomotion on a treadmill was recorded through  
412 automated high-speed motion-capture (DigiGait, Mouse Specifics Inc., Framingham, USA) as  
413 described previously<sup>21, 50, 66</sup>. This method generates over 50 different gait variables, which exceed  
414 the number of observations (8-9 animals per genotype) and are partially redundant. We therefore  
415 used the Partial Least Squares (PLS) regression which is optimized for predictive modeling of  
416 multivariate data and to deal with multicollinearity among variables. Orthogonal Signal Correction  
417 PLS (OSC-PLS) was used as an extension of PLS to separate continuous variable data into  
418 predictive and uncorrelated information for improved diagnostics as well as more easily interpreted  
419 visualization. The method seeks to maximize the explained variance between-groups in a single  
420 dimension and separates the within-group variance (orthogonal to classification goal) into  
421 orthogonal dimensions or components. We modified an existing R script<sup>51,52</sup>, originally designed for

422 chemometrics analysis<sup>53</sup>, to adapt it to our behavior data. The OSC-PLS method was applied to the  
423 complete centered-scaled dataset in order to define a model. This highly complex model was then  
424 optimized to establish a robust model, the most parsimonious with the highest prediction  
425 performance (not shown). A model with an optimal number of 2 components was used for  
426 subsequent analysis in both fore and hindlimbs. Our model coefficient of determination Q<sup>2</sup>, i.e. the  
427 model's fit to the training data, and its Root Mean Square Error of Prediction (RMSEP), i.e. the  
428 model's predictive ability on the testing data were calculated using the Leave-One-Out method<sup>51</sup>.  
429 The model was finally validated to ensure that it was performing better than a random model, while  
430 not being over-fitted. We conducted an internal cross validation by performing permutations in the  
431 original data, from which 2/3 was used to fit a model. This model was then used to predict group  
432 memberships on the remaining 1/3 testing set. The process was repeated 100 times and Q<sup>2</sup> and  
433 RMSEP values were averaged over the repeats. We finally compared our model's Q<sup>2</sup> and RMSEP  
434 values to the mean Q<sup>2</sup> and mean RMSEP values of the permuted models. The results of the two-  
435 sample Student's t-tests used for the comparisons indicated a probability much inferior to 0.1% of  
436 achieving a performance similar to our model by random chance.

437

#### 438 **Precision Movement Tasks**

439 Precision movements were successively tested using a custom- built setup with a 100 cm horizontal  
440 beam of 20, 25 and 30 mm width, respectively<sup>54</sup>. Age-matched control (n=4) and Err2/3<sup>cko</sup> (n=4) 10-  
441 month-old female mice were trained to move across the beam into a home cage at its end. The  
442 animals were trained for 3 days (4 trials/animal, bidirectional on the beam) and tested on the fourth  
443 day (4-5 trials/animal, bidirectional on the beam). Furthermore, a custom-built setup to record  
444 skilled locomotion on a 100 cm horizontal ladder, with 3 mm rungs spaced at 14 mm (similar to the  
445 setup previously described)<sup>9</sup> was used to test age-matched 8 weeks-old female control (n=5) and  
446 Err2/3<sup>cko</sup> (n=5) mice. Mice were trained to move across the ladder into a home cage placed at its end  
447 and were trained for 2 days (3 trials/animal, single direction on the ladder) for two-weeks and tested  
448 on the third day of the second week (4-5 trials/animal, single direction on the ladder). The animals  
449 were rested in their home cage for 1 minute between trials for both tasks. Animal locomotion was  
450 recorded using GoPro HD Hero2 (GoPro Inc., San Mateo, U.S.A) fitted to a custom-built slider  
451 track. The videos were acquired at 120 fps at an image size of 848x480 and stored as MP4 files. The  
452 videos were processed using GoPro Studio Version (2.5.4) and proDAD Defishr Version 1.0  
453 (proDAD GmbH, Immendingen, Germany). The figure videos were slowed to 25-40% of original  
454 speed and reduced to 60 fps using GoPro Studio Version (2.5.4). The fish-eye view was removed  
455 from videos using proDAD Defishr Version 1.0 (proDAD GmbH, Immendingen, Germany) with  
456 Mobius A Wide presets and Zoom adjusted to 110.0 or 180.0. A "miss" was scored when the mouse

457 paw failed to locate the rung or the beam leading to the animal to slip or to halt until the paw  
458 regained its footing. An average of ~40 steps per trial were analyzed for each mouse.

459

#### 460 **Muscle spindle afferent recordings**

461 *Ex vivo* extensor digitorum longus (EDL) muscle-nerve preparations were used to study the  
462 response of muscle sensory neurons to stretch and was essentially performed as described<sup>31</sup>. Briefly,  
463 the dissection of muscle (with the nerve attached) was performed in low calcium and high  
464 magnesium solution<sup>31,55</sup>. Then, the muscle was placed in recording solution 22-24 °C and  
465 equilibrated with carbogen and was then hooked to a dual force and length controller -transducer  
466 (300C-LR, Aurora Scientific Inc., Aurora, Canada) with the help of 5-0 sutures tied to its tendons.  
467 Following the determination of resting length (Lo) as described in previous studies, a suction  
468 electrode (tip diameter 50-80 µm) connected to an extracellular amplifier (EXT-02F, npi Electronics  
469 GmbH, Tamm Germany) was used to sample muscle spindle afferent activity. Data acquisition was  
470 performed with LabChart 8 connected to PowerLab 8/35 (ADInstruments Ltd., Oxford, UK).  
471 Afferent activity, when obtained was checked for the presence of a characteristic pause following a  
472 series of 30 twitch contractions at 1Hz and if the pause was present, the unit was identified as a  
473 muscle spindle afferent. Then a series of 9 ramp and hold stretches were delivered to the muscle  
474 (2.5% Lo, 5% Lo and 7.5% Lo at 40% Lo/sec, protocols were kindly provided by K.A. Wilkinson  
475 lab). The data was recorded and analyzed offline with a custom written MATLAB code. Spikes  
476 were detected using KMEANS (2). For each afferent, resting discharge (RD), dynamic peak  
477 discharge (DP), dynamic index (DI) and static response (SR) were calculated. A total of 10 control  
478 and 10 *Err2/3*<sup>cko</sup> animals were used for recordings, from which 8 control and 9 *Err2/3*<sup>cko</sup> spindle  
479 afferents were analyzed.

480

#### 481 **Molecular cloning**

482 Mouse *Esrrb* (NM\_011934.4) (*Err2*) and Mouse *Esrrg* (NM\_011935.3) (*Err3*) open reading frames  
483 were isolated using PrimeScript 1st cDNA synthesis Kit Takara Bio Europe SAS, Saint-Germain-  
484 en-Laye, France) following manufacturer's directions from E18.5 mouse spinal cord total RNA and  
485 cloned after PCR amplification with the following oligonucleotide primers:

486 *Esrrb* Forward 5'-CATGCCATGGATGTCGTCCGAAGACAGGCACC-3',

487 *Esrrb* Reverse 5'-CATGCCATGGCACCTTGGCCTCCAGCATCTCCAGG-3',

488 *Esrrg* Forward 5'-CATGCCATGGATGGATTTCGGTAGAACTTTGC-3' ,

489 *Esrrg* Reverse 5'-CATGCCATGGGACCTTGGCCTCCAGCATTTCC-3'.

490 The chick *Kcna10* (NP\_989793) open reading frame was isolated from E5.5 chick embryo total  
491 RNA as above using the following primers:

492 *Kcna10* Forward 5'-ATGATGGACGTGTCCAGTTGG-3'

493 *Kcna10* Reverse 5'-TTTTTTGGCCTTGTCTCGAGG-3'.

494 Thus, synthesized cDNAs were subcloned into an expression vector between *CMV* promoter in  
495 frame with an Aphthovirus 2A peptide-GFP fusion sequence for co-translational cleavage<sup>56</sup>. This  
496 entire cassette was flanked by *Tol2* sites facilitating genomic integration upon co-transfection with  
497 *Tol2* transposase as described<sup>21</sup>. Err2VP16 was generated by fusing the open reading frame for the  
498 herpes simplex virus-1 (HSV-1) VP16 (amplified from *pActPL-VP16AD* plasmid, Addgene plasmid  
499 #15305, Watertown, USA) activation domain to Err2. Err2EnR was generated by fusing the open  
500 reading frame of the transcriptional repressor domain of *Drosophila* Engrailed (amplified from  
501 *CAG-EnR* plasmid, Addgene plasmid #19715, Addgene, Watertown, USA) to Err2.

502

### 503 **Chick motor neuron electrophysiology**

504 Chick embryos electroporated at E2.7-E3.0 (HH stages 14-18) with appropriate DNA constructs  
505 were harvested at E12-15 (HH stages 38-41) and processed as described previously<sup>21</sup>. Briefly, chick  
506 embryos were placed on ice for 5 minutes, extracted from the egg, decapitated and dissected in a  
507 petri dish containing cold chick aCSF (CaCSF) solution (mM): 139 NaCl, 3 KCl, 1 MgCl<sub>2</sub>, 17  
508 NaHCO<sub>3</sub>, 12.2 dextrose, 3 CaCl<sub>2</sub>. The solution pH was adjusted to 7.25 with KOH and the  
509 osmolarity was adjusted to ~315 mOsm using sucrose. The thoracolumbar region of the spinal cord  
510 (with the vertebral column intact) was isolated and embedded in an agarose block (4% agarose in  
511 CaCSF) using 20% gelatin in CaCSF. Slices (370 μm) were obtained using a Leica VT1200 S  
512 vibrating blade microtome (Leica Biosystems GmbH, Nussloch, Germany) and incubated in CaCSF  
513 for 30 minutes at room temperature (22°C). Motor neurons were visualized by GFP expression  
514 using 4x air objective (Olympus UPlan FL N) and 40x water-immersion objective (Olympus UPlan  
515 FI N) equipped on an Olympus BX51W1 microscope. The patch pipette (resistances of 3-6 MΩ)  
516 was filled with intracellular solution (mM): 130 MeSO<sub>3</sub>H, 10 KCl, 2 MgCl<sub>2</sub>, 0.4 EGTA, 10 HEPES,  
517 2 ATP-Mg<sup>2+</sup> salt, 0.4 GTP-Na<sup>+</sup> salt, 0.1 CaCl<sub>2</sub>. The solution pH was adjusted to 7.3 with KOH and  
518 the osmolarity was adjusted to ~315 mOsm using sucrose. The intracellular solution contained 25  
519 μM Alexa fluor 568 dye (Thermo Fisher Scientific, Inc., Waltham, USA) to label recorded motor  
520 neurons. Current-clamp recording signals were amplified and filtered using MultiClamp 700B  
521 patch-clamp amplifier (Molecular Devices LLC., San Jose, USA). The signal acquisition was  
522 performed at 20 kHz using Digidata 1322A digitizer (Molecular Devices LLC., San Jose, USA) and  
523 pCLAMP 10.4 software (Molecular Devices LLC., San Jose, USA).

524

## 525 RNA sequencing and transcriptome analysis

526 E12.5 (HH St. 38-39) chick lumbar spinal motor columns transfected with either *CMV::eGFP*, or  
527 *CMV::Err2VP16.2A.eGFP* or *Dlk1.IRES.eGFP* plasmids were identified by GFP fluorescence,  
528 dissected and collected. RNA isolation and RNA sequencing were carried out as described  
529 previously<sup>57</sup>. Briefly, RNA was isolated using Tri-Reagent (Sigma-Aldrich Chemie GmbH,  
530 Taufkirchen, Germany) and Phenol-Chloroform extraction according to the manufacturer's protocol.  
531 RNA quality was assessed using Nanodrop 2000 (Thermo Fisher Scientific, GmbH) and RNA  
532 integrity number (RIN) was evaluated by using the Agilent 2100 Bioanalyzer (Agilent  
533 Technologies, Inc., USA). RNA was reverse transcribed to cDNA using Transcriptor High Fidelity  
534 cDNA synthesis kit (Roche Diagnostics Deutschland GmbH, Mannheim, Germany) and RNA-Seq  
535 libraries were obtained using TruSeq RNA Sample Preparation v2 kit (Illumina, Inc., San Diego,  
536 USA). To analyze the library quality, Agilent 2100 Bioanalyzer (Agilent Technologies, Inc., Santa  
537 Clara, USA) was used and the concentration was measured by a Qubit<sup>R</sup> dsDNA HS Assay kit  
538 (Thermo Fisher Scientific Inc., Waltham, USA). The concentration was adjusted to 2 nM prior to  
539 sequencing (50 bp) on a HiSeq 2000 sequencer (Illumina, Inc., San Diego, USA) using TruSeq SR  
540 Cluster kit v3-cBot-HS (Illumina, Inc., San Diego, USA) and TruSeq SBS kit v3-HS (Illumina, Inc.,  
541 San Diego, USA) based on manufacturer's instructions. RNA-sequencing quality was evaluated by  
542 utilizing raw reads using the FastQC quality control tool version 0.10.1<sup>58</sup>. Bowtie2 v2.0.2 using  
543 RSEM version 1.2.29 with default parameters was utilized to align sequence reads (single-end 50  
544 bp) to chicken reference genome (Galgal5)<sup>59,60</sup>. Prior to indexing, GFP, Err2, Dlk-1, VP16 and  
545 IRES sequences and annotations were added to the reference genome (FASTA file) and annotations  
546 (GTF file). Ensembl annotations (version 86.5) with rsem-prepare-reference from RSEM software  
547 was used to index chicken reference genome<sup>61</sup>. Furthermore, sequence alignment of sequence reads  
548 and gene quantity was obtained through the use of rsem-calculate-expression. Rsem-calculate-  
549 expression resulted in sequence read count and TPM value (transcripts per million) for individual  
550 genes. DESeq2 package was used to carry out differential expression analysis<sup>62</sup>. Finally, genes with  
551 less than 5 reads (baseMean) were filtered, while genes with an adjusted p-value < 0.05 were  
552 classified as differentially expressed. Gene ontologies and categorization was performed using the  
553 DAVID Gene Functional Classification Tool<sup>67</sup>.

554

## 555 Enhancer identification and promoter assays

556 Evolutionary conserved non-coding genomic regions (ECRs) around the *Kcna10* genomic locus  
557 were identified using the ECR Browser<sup>63</sup> and screened for potential Err2/Err3 transcription factor  
558 binding sites using the JASPAR CORE database<sup>64</sup>. A 240 bp ECR 3.5 kb upstream of the *Kcna10*  
559 transcription start site with three putative Err2/Err3 binding sites was amplified from mouse  
560 genomic DNA using the following primers: Forward 5'-TCTCACAGCCCTGCTCATC-3' and



561 Reverse 5'-CTTGCCTGAGAACCTGATCTCC-3' and subcloned into a reporter vector containing  
562 a minimal promoter followed by tdTomato coding sequence, which together were flanked by *Tol2*  
563 sites to facilitate stable genomic integration. To test promoter activity and potential regulation by  
564 *Err2/3*, Lohmann LSL fertilized chick eggs were incubated until E2.7-E3.0 (HH stages 14-18) and  
565 chick embryo neural tubes were electroporated *in ovo* using the ECM 830 electroporation system  
566 (BTX/Harvard Apparatus Inc., Holliston, USA) as described<sup>21</sup>. *Kcna10::tdTomato* reporter plasmids  
567 together with either *CMV::2A.eGFP* or *CMV::VP16:Err2.2A.eGFP* at a molar ratio of 1:1 were  
568 transfected.

569

## 570 **Data Availability**

571 All data are available in the manuscript or the supplementary materials. Raw data are available upon  
572 reasonable request to the corresponding author.

573

574

575

576

577

578

579

580

581

582

583

584

585

586

587

588

589

590

591

592

593

594

595

596

597 **References**

598

- 599 1. C. S. Sherrington. *The Integrative Action of the Nervous System* (C. Scribner and Sons, New  
600 York, 1906).
- 601 2. J. Song, K. Ampatzis, E. Björnfors, A. El Manira. Motor neurons control locomotor circuit  
602 function retrogradely via gap junctions. *Nature* **529**, 399–402 (2016).
- 603 3. L. Leksell. The action potentials and excitatory effects of the small ventral root fibres to  
604 skeletal muscle. *Acta Physiol. Scand.* **10** (Suppl. 31), 1-84 (1945).
- 605 4. C. C. Hunt. The reflex activity of mammalian small-nerve fibres. *J. Physiol.* **115**, 456-469  
606 (1951).
- 607 5. R. Granit, H. D. Henatsch. Gamma control of dynamic properties of muscle spindles. *J.*  
608 *Neurophysiol.* **19**(4), 356-66 (1956).
- 609 6. K. S. Murthy. Vertebrate fusimotor neurones and their influence on motor behavior. *Prog.*  
610 *Neurobiol.* **11**, 249-307 (1978).
- 611 7. R.M. Brownstone, T. V. Bui, N. Stifani. Spinal circuits for motor learning. *Curr. Opin.*  
612 *Neurobiol.* **33**, 166-73 (2015).
- 613 8. U. Proske, S. C. Gandevia. The proprioceptive senses: their roles in signaling body shape,  
614 body position and movement, and muscle force. *Physiol. Rev.* **92**, 1651–1697 (2012).
- 615 9. T. Akay, W. G. Tourtellotte, S. Arber, T. M. Jessell. Degradation of mouse locomotor  
616 pattern in the absence of proprioceptive sensory feedback. *Proc. Natl. Acad. Sci. U.S.A.*,  
617 **25**;111(47), 16877-82 (2014).
- 618 10. A. Takeoka, I. Vollenweider, G. Courtine, S. Arber. Muscle spindle feedback directs  
619 locomotor recovery and circuit reorganization after spinal cord injury. *Cell*, **18**;159(7),  
620 1626-39 (2014)
- 621 11. O. Kiehn. Decoding the organization of spinal circuits that control locomotion. *Nat. Rev.*  
622 *Neurosci.*, **17**(4), 224–238 (2016).
- 623 12. M. Dimitrou, B. B. Edin. Human muscle spindles act as forward sensory models. *Curr.*  
624 *Biol.* **20**(19) 1763-7 (2010).
- 625 13. R. E. Kemm, D. R. Westbury. Some properties of spinal gamma-motoneurones in the cat,  
626 determined by micro-electrode recording. *J. Physiol.* **282**, 59-71 (1978).
- 627 14. J. C. Eccles, R. M. Eccles, A. Lundberg. The convergence of monosynaptic excitatory  
628 afferents on to many different species of alpha motoneurones. *J. Physiol.* **137**(1) 22-50  
629 (1957).
- 630 15. J. C. Eccles, R. M. Eccles, A. Iggo, A. Lundberg. Electrophysiological studies on gamma  
631 motoneurones. *Acta Physiol. Scand.* **50**, 32-40 (1960).
- 632 16. H. Zeng, J. R. Sanes. Neuronal cell-type classification: challenges, opportunities and the  
633 path forward. *Nat. Rev. Neurosci.* **18**, 530-546 (2017).

- 634 17. D. W. Allan, S. Thor. Transcriptional selectors, masters, and combinatorial codes:  
635 regulatory principles of neural subtype specification. *Wiley Interdiscip. Rev. Dev. Biol.* **4**,  
636 505-528. (2015).
- 637 18. O. Hobert, P. Kratsios. Neuronal identity control by terminal selectors in worms, flies, and  
638 chordates. *Curr Opin Neurobiol.* **56**, 97-105 (2019).
- 639 19. Y.Z. Kurmangaliyev, J. Yoo, S.A. LoCascio, S.L. Zipursky. Modular transcriptional  
640 programs separately define axon and dendrite connectivity. *Elife.* **5**, 50822. (2019).
- 641 20. J.E. Zengel, S.A. Reid, G.W. Sypert, J.B. Munson. Membrane electrical properties and  
642 prediction of motor-unit type of medial gastrocnemius motoneurons in the cat. *J.*  
643 *Neurophysiol.* **53**, 1323–1344 (1985).
- 644 21. D. Müller, P. Cherukuri, K. Henningfeld, C.H. Poh, L. Wittler, P. Grote, O. Schlüter, J.  
645 Schmidt, J. Laborda, S.R. Bauer, R.M. Brownstone, T. Marquardt. Dlk1 promotes a fast  
646 motor neuron biophysical signature required for peak force execution. *Science* **343**, 1264–  
647 1266 (2014).
- 648 22. K.W. Kelley, L Ben Haim, L. Schirmer, G.E. Tyzack, M. Tolman, J. G. Miller, H. H. Tsai,  
649 S. M. Chang, A. V. Molofsky, Y. Yang, R. Patani, A. Lakatos, E. M. Ullian, D. H. Rowitch.  
650 Kir4.1-Dependent Astrocyte-Fast Motor Neuron Interactions Are Required for Peak  
651 Strength. *Neuron* **98**, 306-319 (2018).
- 652 23. N. A. Shneider, M. N. Brown, C. A. Smith, J. Pickel, F. J. Alvarez. Gamma motor neurons  
653 express distinct genetic markers at birth and require muscle spindle-derived GDNF for  
654 postnatal survival. *Neural Dev.* **4**, 42 (2009).
- 655 24. A. Friese, J. A. Kaltschmidt, D. R. Ladle, M. Sigrist, T. M. Jessell. S. Arber, Gamma and  
656 alpha motor neurons distinguished by expression of transcription factor Err3. *Proc. Natl.*  
657 *Acad. Sci. U.S.A.* **106**(32), 13588-93 (2009).
- 658 25. C.R. Dufour, B. J. Wilson, J. M. Huss, D. P. Kelly, W. A. Alaynick, M. Downes, R. M.  
659 Evans, M. Blanchette, V. Giguère. Genome-wide orchestration of cardiac functions by the  
660 orphan nuclear receptors ERRalpha and gamma. *Cell Metab.* **5**, 345-56 (2007).
- 661 26. A.B. Rosenberg, C.M. Roco, R.A. Muscat, A. Kuchina, P. Sample, Z.Yao, L.T. Graybuck,  
662 D.J. Peeler, S. Mukherjee, W. Chen, et al.,. Single-cell profiling of the developing mouse  
663 brain and spinal cord with split-pool barcoding. *Science* **360**, 176–182 (2018).
- 664 27. D.R. Westbury. A comparison of the structures of alpha- and gamma-spinal motoneurons  
665 of the cat. *J. Physiol.* **325**, 79-91 (1982).
- 666 28. G.W. Davis. Homeostatic signaling and the stabilization of neural function. *Neuron* **80**, 718-  
667 728 (2013).
- 668 29. L. Salkoff, K. Baker, A. Butler, M. Covarrubias, M.D. Pak, A. Wei. An essential 'set' of K+  
669 channels conserved in flies, mice and humans. *Trends Neurosci.* **15**, 161-166 (1992).

- 670 30. V. Wolfram, T.D. Southall, A.H. Brand, R.A. Baines. The LIM-homeodomain protein Islet  
671 dictates motor neuron electrical properties by regulating K<sup>+</sup> channel expression. *Neuron* **75**,  
672 663-674 (2012).
- 673 31. K.A. Wilkinson, H.E. Kloefkorn, S. Hochman, S. Characterization of muscle spindle  
674 afferents in the adult mouse using an in vitro muscle-nerve preparation. *PLoS One*.  
675 **7**(6):e39140 (2012).
- 676 32. L. Gerwin, C. Haupt, K.A. Wilkinson, S. Kröger. Acetylcholine receptors in the equatorial  
677 region of intrafusal muscle fibres modulate mouse muscle spindle sensitivity. *J Physiol*.  
678 **597**(7):1993-2006 (2019).
- 679 33. P.B. Matthews. The differentiation of two types of fusimotor fibre by their effects on the  
680 dynamic response of muscle spindle primary endings. *Q. J. Exp. Physiol. Cogn. Med. Sci.*  
681 **47**, 324-33 (1962).
- 682 34. G.L. Kidd. Excitation of primary muscle spindle endings by beta-axon stimulation. *Nature*  
683 **203**, 1248-51, (1964).
- 684 35. P. Bessou, F. Emonet-Dénand, Y. Laporte. Motor fibers innervating extrafusal and  
685 intrafusal muscle fibers in the cat. *J. Physiol. (Lond.)*, **180**, pp. 649-672 (1965).
- 686 36. W. Z. Rymer, S. E. Grill. Reflex excitation of beta and gamma motoneurons in *The muscle*  
687 *spindle*, Eds. I. A. Boyd, M. H. Gladden, Eds. (The McMillian Press LTD, London 1985),  
688 chap. 44, pp. 303-308.
- 689 37. L. Madisen, T.A. Zwingman, S.M. Sunkin, S. W. Oh, H. A. Zariwala, H. Gu, L. L. Ng, R.  
690 D. Palmiter, M. J. Hawrylycz, A. R. Jones, et al. A robust and high-throughput Cre  
691 reporting and characterization system for the whole mouse brain. *Nat. Neurosci.* **13**, 133–  
692 140 (2010).
- 693 38. J. Rossi, N. Balthasar, D. Olson, M. Scott, E. Berglund, C. E. Lee, M. J. Choi, D. Lauzon,  
694 B. B. Lowell, J. K. Elmquist. Melanocortin-4 receptors expressed by cholinergic neurons  
695 regulate energy balance and glucose homeostasis. *Cell Metab.* **13**, 195–204 (2011).
- 696 39. L. Li, S. H. Yun, J. Keblesh, B. L. Trommer, H. Xiong, J. Radulovic, W. G. Tourtellotte.  
697 *Egr3*, a synaptic activity regulated transcription factor that is essential for learning and  
698 memory. *Mol. Cell. Neurosci.*, **35**: 76-88 (2007).
- 699 40. J. Chen, J. Nathans. Estrogen-related receptor beta/NR3B2 controls epithelial cell fate and  
700 endolymph production by the stria vascularis. *Dev. Cell* **13**, 325–337 (2007).
- 701 41. L. Wang, R. Klein, B. Zheng, T. Marquardt. Anatomical coupling of sensory and motor  
702 nerve trajectory via axon tracking. *Neuron* **71**:263–277 (2011).
- 703 42. B. Gallarda, D. Bonanomi, D. Müller, A. Brown, W. A. Alaynick, G. Lemke, S. L. Pfaff, T.  
704 Marquardt. Segregation of axial sensory and motor pathways through heterotypic trans-  
705 axonal signaling. *Science* **320**: 233-236 (2008).

- 706 43. L. Wang, A. Mongera, D. Bonanomi, L. Cyganek, S. L. Pfaff, C. Nüsslein-Volhard, T.  
707 Marquardt. A conserved axon type hierarchy governing peripheral nerve assembly.  
708 *Development* **141**:1875–1883 (2014).
- 709 44. M. J. Fogarty, L. A. Hammond, R. Kanjhan, M. C. Bellingham, P. G. Noakes. A method for  
710 the three-dimensional reconstruction of Neurobiotin<sup>TM</sup>-filled neurons and the location of  
711 their synaptic inputs. *Front Neural Circuits* **7**, 153 (2013).
- 712 45. T. Muramoto, B. Mendelson, K. D. Phelan, E. Garcia-Rill, R. D. Skinner, C. Puskarich-  
713 May. Developmental changes in the effects of serotonin and N-methyl-D-aspartate on  
714 intrinsic membrane properties of embryonic chick motoneurons. *Neuroscience* **75**, 607–618  
715 (1996).
- 716 46. G. B. Miles, Y. Dai, R. M. Brownstone. Mechanisms underlying the early phase of spike  
717 frequency adaptation in mouse spinal motoneurons. *J. Physiol. (Lond.)* **566**, 519–532  
718 (2005).
- 719 47. P. Mitra, R. M. Brownstone. An in vitro spinal cord slice preparation for recording from  
720 lumbar motoneurons of the adult mouse. *Journal of Neurophysiology* **107**, 728–741 (2012).
- 721 48. S. T. Nakanishi, P. J. Whelan. Diversification of intrinsic motoneuron electrical properties  
722 during normal development and botulinum toxin-induced muscle paralysis in early postnatal  
723 mice. *J. Neurophysiol.* **103**, 2833–2845 (2010).
- 724 49. M. Manuel, C. Iglesias, M. Donnet, F. Leroy, C. J. Heckman, D. Zytnicki. Fast Kinetics,  
725 High-Frequency Oscillations, and Subprimary Firing Range in Adult Mouse Spinal  
726 Motoneurons. *Journal of Neuroscience* **29**, 11246–11256 (2009).
- 727 50. I. Amende, A. Kale, S. McCue, S. Glazier, J. P. Morgan, T. G. Hampton. Gait dynamics in  
728 mouse models of Parkinson’s disease and Huntington’s disease. *J Neuroeng Rehabil.* **2**, 20  
729 (2005).
- 730 51. D. Grapov. DeviumWeb: Dynamic Multivariate Data Analysis and Visualization Platform.  
731 v0.3.2 (Nov. 25, 2014). DOI: 10.5281/zenodo.12879.
- 732 52. R Core Team. R: A language and environment for statistical computing. R Foundation for  
733 Statistical Computing, Vienna, Austria (2015). URL [www.R-project.org/](http://www.R-project.org/)
- 734 53. R. Wehrens. *Chemometrics with R- Multivariate Data Analysis in the Natural Sciences and*  
735 *Life Sciences*. Springer, Heidelberg, 2011). DOI: 10.1007/978-3-642-17841-2.
- 736 54. S. Bourane, K. S. Grossmann, O. Britz, A. Dalet, M. G. Del Barrio, F. J. Stam, L. Garcia-  
737 Campmany, S. Koch, M. Goulding, M. Identification of a spinal circuit for light touch and  
738 fine motor control. *Cell* **160**, 503–515 (2015).
- 739 55. S-H. Woo, V. Lukacs, C. J. De Nooij, D. Zaytseva, C. R. Criddle, A. Francisco, T. M.  
740 Jessell, K. A. Wilkinson, A. Patapoutian. Piezo2 is the principal mechanotransduction  
741 channel for proprioception. *Nat Neurosci.* **18**(12):1756-62 (2015).

- 742 56. G. Trichas, J. Begbie, S. Srinivas. Use of the viral 2A peptide for bicistronic expression in  
743 transgenic mice. *BMC Biol.* **6**, 40 (2008).
- 744 57. R. Halder, M. Hennion, R. O. Vidal, O. Shomroni, R-U. Rahman, A. Rajput, T. P. Centeno,  
745 F. van Bebber, V. Capece, J. C. G. Vizcaino, et al. DNA methylation changes in plasticity  
746 genes accompany the formation and maintenance of memory. *Nature Neuroscience* **19**,  
747 102–110 (2016).
- 748 58. S. Andrews. FastQC: a quality control tool for high throughput sequence data (2010). URL  
749 [www.bioinformatics.babraham.ac.uk/projects/fastqc](http://www.bioinformatics.babraham.ac.uk/projects/fastqc)
- 750 59. B. Langmead, S. L. Salzberg. Fast gapped-read alignment with Bowtie 2. *Nature Methods* **9**,  
751 357–359 (2012).
- 752 60. B. Li, C. N. Dewey. RSEM: accurate transcript quantification from RNA-Seq data with or  
753 without a reference genome. *BMC Bioinformatics* **12**, 323 (2011).
- 754 61. A. Yates, W. Akanni, M. R. Amode, D. Barrell, K. Billis, D. Carvalho-Silva, C. Cummins,  
755 P. Clapham, S. Fitzgerald, L. Gil, L., et al. Ensembl 2016. *Nucleic Acids Res.* **44**, D710- 716  
756 (2016).
- 757 62. M. I. Love, W. Huber, S. Anders. Moderated estimation of fold change and dispersion for  
758 RNA-seq data with DESeq2. *Genome Biol.* **15**, 550 (2014).
- 759 63. I. Ovcharenko, M. A. Nobrega, G. G. Loots, L. Stubbs. ECR Browser: a tool for visualizing  
760 and accessing data from comparisons of multiple vertebrate genomes. *Nucleic Acids Res.*  
761 **32**, W280-286 (2004).
- 762 64. A. Mathelier, O. Fornes, D. J. Arenillas, C-Y. Chen, G. Denay, J. Lee, W. Shi, C. Shyr, G.  
763 Tan, R. Worsley-Hunt, et al. JASPAR 2016: a major expansion and update of the open-  
764 access database of transcription factor binding profiles. *Nucleic Acids Res.* **44**, D110-115  
765 (2016).
- 766 65. M. Hadzipasic, B. Tahvildari. M. Nagy, M. Bian, A. L. Horwich, D. A. McCormick.  
767 Selective degeneration of a physiological subtype of spinal motor neuron in mice with  
768 SOD1-linked ALS. *Proc Natl Acad Sci U S A.* **111**(47):16883-8 (2014).
- 769 66. R. Yuengert, K. Hori, E. E. Kibodeaux, J. X. McClellan, J. E. Morales, T.-W.P. Huang, J. L.  
770 Neul, H. C. Lai. Origin of a Non-Clarke’s Column Division of the Dorsal Spinocerebellar  
771 Tract and the Role of Caudal Proprioceptive Neurons in Motor Function. *Cell Rep* **13**,  
772 1258–1271 (2015).
- 773 67. D. Huang, B. T. Sherman, R. A. Lempicki, R. A. Systematic and integrative analysis  
774 of large gene lists using DAVID bioinformatics resources. *Nature protocols*, **4**(1), 44–57  
775 (2009).
- 776  
777  
778

779 **Acknowledgments**

780  
781 We thank Louisa Dorr, Simeon Helgers, Beate Veith, Alexandra Klusowski, Brenda Ross for  
782 technical assistance and Rob Brownstone (UC London) for help setting up P20-22 motor neuron  
783 recordings, Warren G. Tourtellotte (Northwestern University, currently Cedars Sinai Medical  
784 Center) for the *Egr3<sup>ko</sup>* mice and Stephan Kröger (LMU Munich) for help setting up muscle spindle  
785 recordings. This research received funding from the European Research Council under the European  
786 Union's Seventh Framework Programme (FP/2007-2013)/ERC Grant Agreement 311710-MU  
787 TUNING, the Göttingen Excellence Cluster for Nanoscale Microscopy and Molecular Physiology  
788 of the Brain, Deutsche Forschungsgemeinschaft (DFG) Research Center 103, Section B1 and the  
789 BMBF. Ashish Rajput, Vikas Bansal, and Stefan Bonn were supported by BMBF IDSN, ERA-Net  
790 E-Rare MAXOMOD, and CRC 1286/Z2. Dario Farina received funding from the European  
791 Research Council through the Synergy Grant NaturalBionicS (contract #810346). Francesco Negro  
792 has received funding from the European Union's Horizon 2020 research and innovation programme  
793 under the Marie Skłodowska-Curie grant agreement No 702491 (NeuralCon).

794

795 **Author Contributions**

796 M.N.K., P.C., F.N., A.R., P.F., T-I.L. Y.B. and W.P.M. conducted the experiments, M.N.K., P.C.,  
797 F.N., V.B., C.L., D.M., T.A., S.B. and D.F. analyzed the data, M.N.K. and T.M. designed the  
798 experiments and wrote the paper.

799

800 **Declaration of Interests**

801 The authors declare no competing interests.

802

803

804

805

806

807

808

809

810

## 811 Main Figures

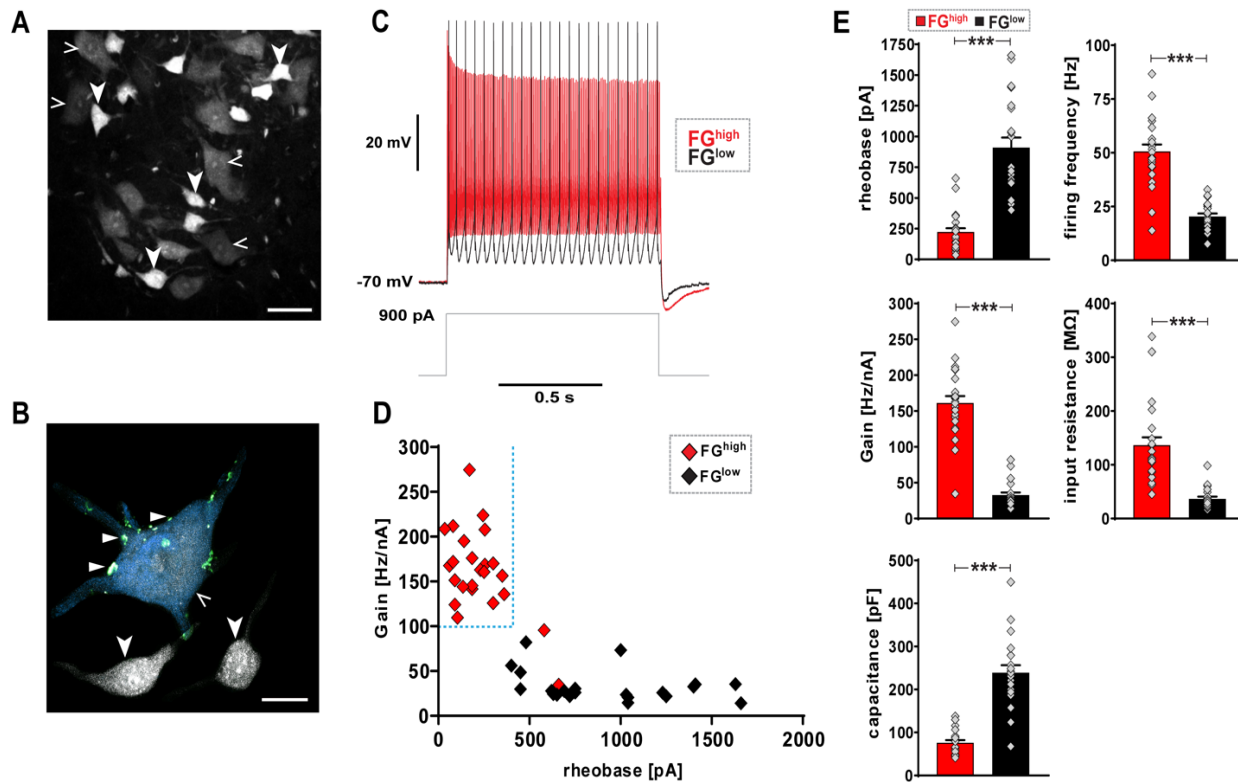

812

813 **Figure 1.** Direct electrophysiological interrogation of alpha and gamma motor neurons shows  
814 unique electrophysiological properties (A-D).

815 (A) Transversal section of P21 (wild-type) mouse lumbar spinal cord ventral horn: motor neurons  
816 labeled by retrograde tracer FluoroGold (FG). Putative alpha motor neurons retain low-levels of FG  
817 in soma (FG<sup>low</sup>) (open arrowheads), while putative gamma motor neurons retain high-levels of FG in  
818 soma (FG<sup>high</sup>) (arrowheads) (scale bar: 50 μm). (B) Imaris 3D reconstruction: vGlut1<sup>+</sup> synaptic  
819 varicosities (triangles) associated with FG<sup>low</sup> and NeuN<sup>high</sup> alpha motor neuron (open arrowheads),  
820 but not with adjacent FG<sup>high</sup> and NeuN<sup>low or negligible</sup> gamma motor neurons (arrowheads) (scale bar: 20  
821 μm). (C) Whole cell patch-clamp recordings: example traces of FG<sup>high</sup> (black) and FG<sup>low</sup> (gray)  
822 motor neurons upon 900 pA, 1 s square current pulse. (D) Scatter plot: FG<sup>high</sup> (n=24, N=16) and  
823 FG<sup>low</sup> (n=22, N=12) motor neurons exhibit divergent gamma and alpha subtype-defining  
824 electrophysiological signatures, respectively, including gamma subtype-specific combination with  
825 low rheobase and high gain by FG<sup>high</sup> motor neurons (see Supplementary Table S1 for details). (E)  
826 FG<sup>high</sup> motor neurons have significantly lower rheobase (pA) ( $221.87 \pm 31.34$ ), higher firing  
827 frequency (Hz) ( $50.65 \pm 3.23$ ), higher gain (Hz/nA) ( $161.01 \pm 9.77$ ), higher input resistance ( $136.62$   
828  $\pm 14.63$ ) and lower capacitance ( $76.07 \pm 6.01$ ) when compared to FG<sup>low</sup> motor neuron rheobase  
829 ( $909.09 \pm 82.11$ ), firing frequency ( $20.41 \pm 1.70$ ), gain ( $32.64 \pm 4.02$ ), input resistance ( $36.55 \pm$   
830  $4.16$ ) and capacitance ( $239.1 \pm 17.17$ ), respectively (see Supplementary Table S1 for details). Data



831 is presented as mean  $\pm$  SEM. n= # of neurons, N= # of mice. Statistically significant differences  
832 between FG<sup>high</sup> and FG<sup>low</sup> neurons are indicated as: \*\*\*p<0.001, Student's t-test).

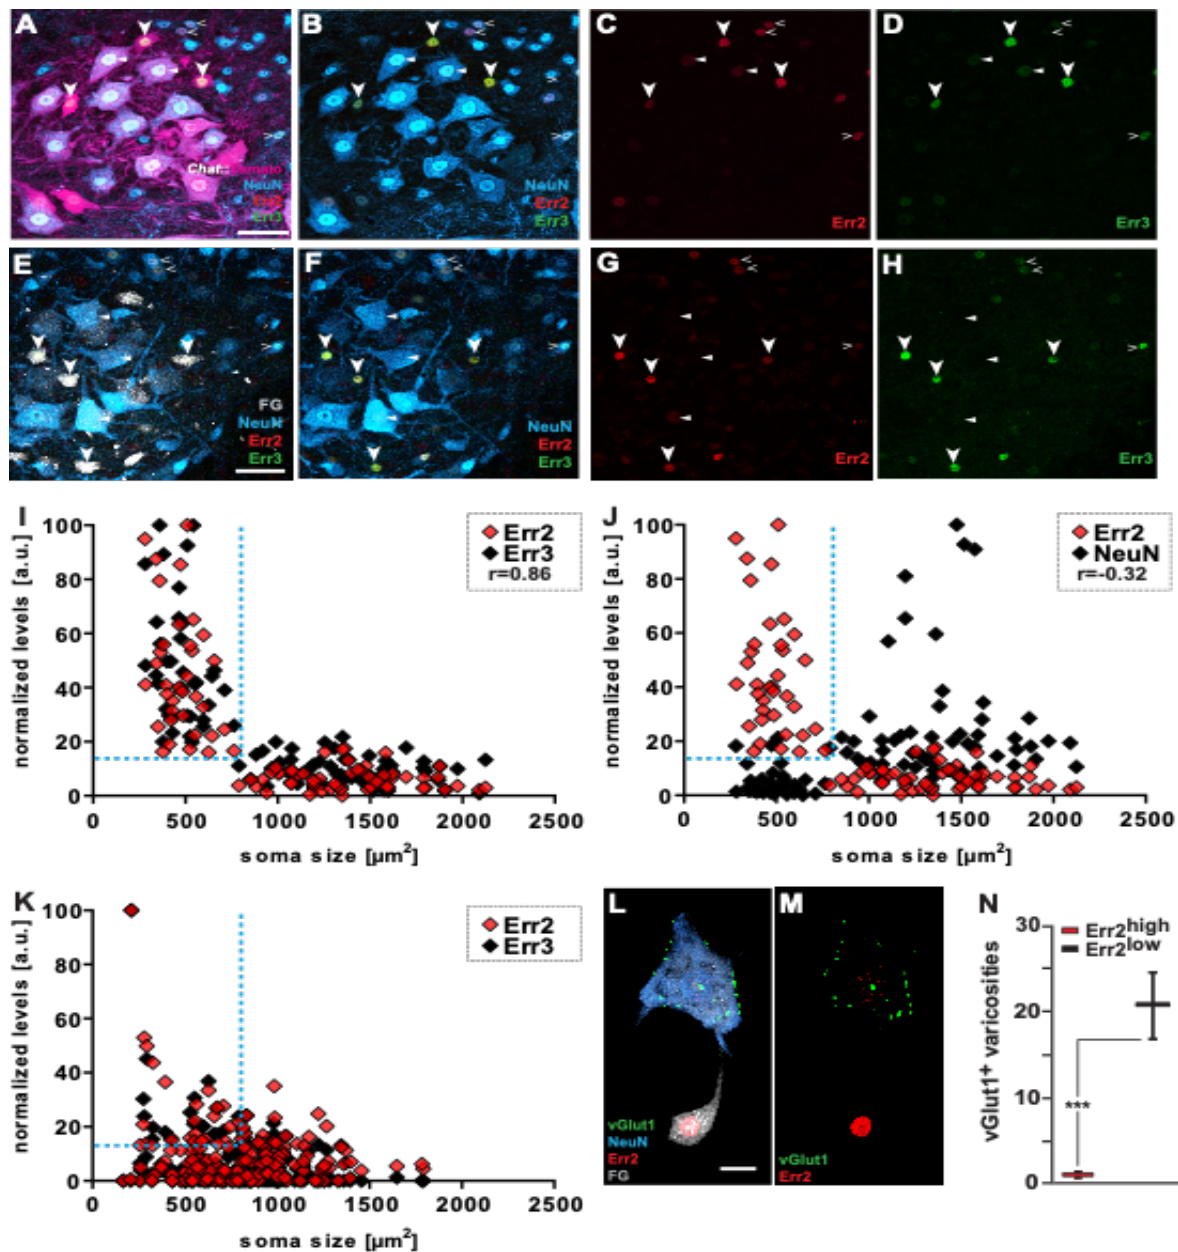

833

834 **Figure 2.** High levels of correlated Err2/3 expression by gamma motor neurons.

835 (A-D). Transversal section of P21 *Chat<sup>Cre</sup>; Rosa26<sup>floxtdTomato</sup>* mouse lumbar spinal cord ventral horn:  
 836 motor neurons genetically labeled by tdTomato (scale bar: 50  $\mu\text{m}$ ). Arrowheads: high Err2 and Err3  
 837 levels in small NeuN<sup>low</sup> or negligible, tdTomato<sup>+</sup> motor neuron nuclei. Open arrowheads: relatively  
 838 moderate-to-high-levels Err2/3 levels in NeuN<sup>high</sup> tdTomato<sup>-</sup> interneurons. Triangles: consistently  
 839 lower but detectable levels in some large motor neurons with moderate-to-high NeuN levels. (E-H).  
 840 Transversal section of P21 (wild-type) mouse lumbar spinal cord ventral horn: motor neurons  
 841 labeled by retrograde tracer FluoroGold (FG) (scale bar: 50  $\mu\text{m}$ ). Arrowheads: high Err2 and Err3  
 842 levels in small NeuN<sup>low</sup> or negligible that retain high levels of FG<sup>high</sup>. Open arrowheads: relatively  
 843 moderate-to-high levels Err2/3 levels in NeuN<sup>high</sup> FG<sup>-</sup> interneurons. Triangles: consistently lower  
 844 but detectable levels in some large motor neurons with moderate-to-high NeuN levels. (I)

845 Quantitative analysis: high Err2 (red) and Err3 (green) levels in motor neurons with small somas  
846 (n=93, N=3, Pearson's correlation ( $r=0.86$ )). **(J)** High Err2 (red) and low NeuN (blue) levels in  
847 motor neurons with small somas (n=93, N=3, Pearson's correlation ( $r=-0.32$ )). **(K)** Loss of high  
848 Err2 (red) and Err3 (green) levels by Egr3-deficient small motor neurons (n=184, N=3). **L-N)** Imaris  
849 3D reconstruction: vGlut1<sup>+</sup> synaptic varicosities associated with Err2<sup>low or negligible</sup> NeuN<sup>high</sup> motor  
850 neuron, but not with adjacent Err2<sup>high</sup> NeuN<sup>low or negligible</sup> motor neuron Err2<sup>low</sup> motor neuron (motor  
851 neurons retrogradely labeled by FluoroGold, FG) (scale bar: 20  $\mu$ m). **N)** Quantification of vGlut1<sup>+</sup>  
852 synaptic varicosities associated with Err2<sup>high</sup> or Err2<sup>low</sup> motor neurons. N= # of mice and n= # of  
853 neurons. Statistically significant differences between motor neurons are indicated as: \* $p<0.05$ ,  
854 \*\* $p<0.01$ , \*\*\* $p<0.001$ , n.s.= not significant, Student's t-test).

855

856

857

858

859

860

861

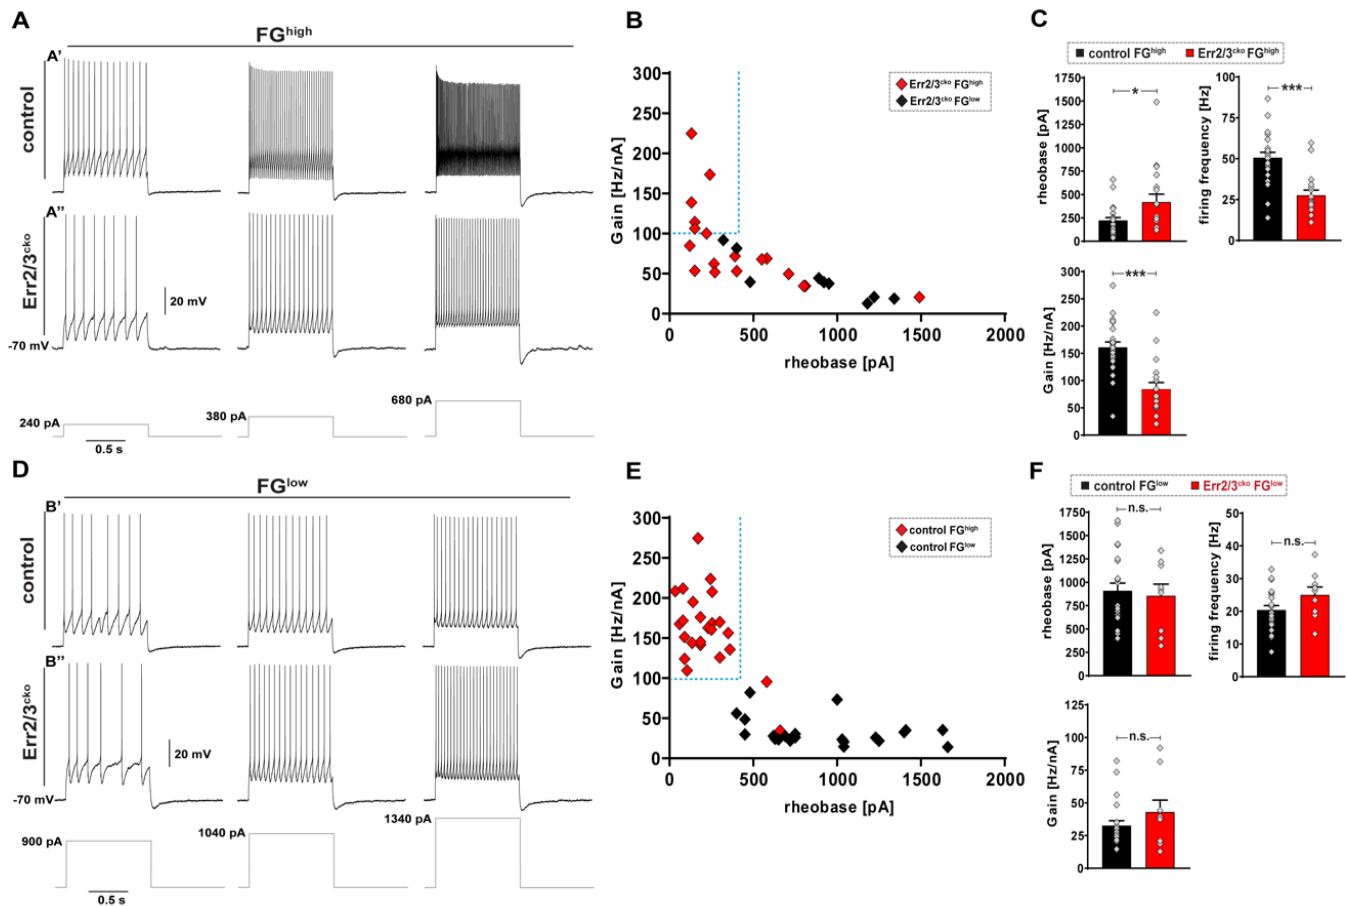

862

863 **Figure 3.** Err2/3 are required for the acquisition of a gamma motor neuron functional properties.

864 **(A)** Example traces of whole cell patch-clamp recordings upon 240, 380 or 680 pA, 1 s square  
 865 current pulses from small soma motor neurons exhibiting high-levels of FG incorporation (FG<sup>high</sup>)  
 866 from control mice or Err2/3<sup>cko</sup> mice. Control FG<sup>high</sup> motor neurons (**A'**) exhibit higher firing rates  
 867 compared to FG<sup>high</sup> Err2/3<sup>cko</sup> motor neurons (**A''**) and gear up their firing rates more rapidly in  
 868 response to current pulses. **(B)** Scatter plot: lack of segregation of Err2/3<sup>cko</sup> FG<sup>high</sup> gamma motor  
 869 neuron and Err2/3<sup>cko</sup> FG<sup>low</sup> alpha motor neuron electrophysiological signatures. **(C)** Err2/3<sup>cko</sup> FG<sup>high</sup>  
 870 motor neurons show higher rheobase ( $419.72 \pm 84.11$ ), lower firing frequency ( $27.61 \pm 3.15$ ) and  
 871 lower gain ( $84.01 \pm 12.34$ ) compared control FG<sup>high</sup> motor neuron rheobase ( $221.87 \pm 31.34$ ), firing  
 872 frequency ( $50.65 \pm 3.23$ ), gain ( $161.01 \pm 9.77$ ), respectively. **(D)** Example traces of whole cell  
 873 patch-clamp recordings upon 900, 1040 or 1340 pA, 1 s square current pulses from large soma  
 874 motor neurons with lower levels of FG incorporation (FG<sup>low</sup>) from control mice or Err2/3<sup>cko</sup> mice.  
 875 Err2/3<sup>cko</sup> FG<sup>high</sup> motor neurons exhibit comparable firing rates and properties to control FG<sup>low</sup> motor  
 876 neurons. **(E)** Scatter plot: segregation of electrophysiological signatures between control FG<sup>high</sup>  
 877 gamma motor neurons versus control FG<sup>low</sup> alpha motor neurons. (Note: Data from is from Fig. 1D).  
 878 **(F)** No significant differences seen in Err2/3<sup>cko</sup> FG<sup>low</sup> alpha motor neuron subtype rheobase ( $855.55$   
 879  $\pm 124.85$ ), firing frequency ( $25.03 \pm 3.76$ ) and gain ( $43.04 \pm 9.81$ ) when compared to control FG<sup>low</sup>  
 880 alpha motor neuron subtype rheobase ( $909.09 \pm 82.11$ ), firing frequency ( $20.41 \pm 1.70$ ), gain ( $32.64$

881  $\pm 4.02$ ), respectively (see Supplementary Table S1 for details). Data is presented as mean  $\pm$  SEM.  
882 n= # of neurons and N= # of mice. Statistically significant differences between FG<sup>high</sup> and FG<sup>low</sup>  
883 neurons are indicated as: \*p<0.05, \*\*p<0.01, \*\*\*p<0.001, n.s.= not significant, Student's t-test).

884

885

886

887

888

889

890

891

892

893

894

895

896

897

898

899

900

901

902

903

904

905

906

907

908

909

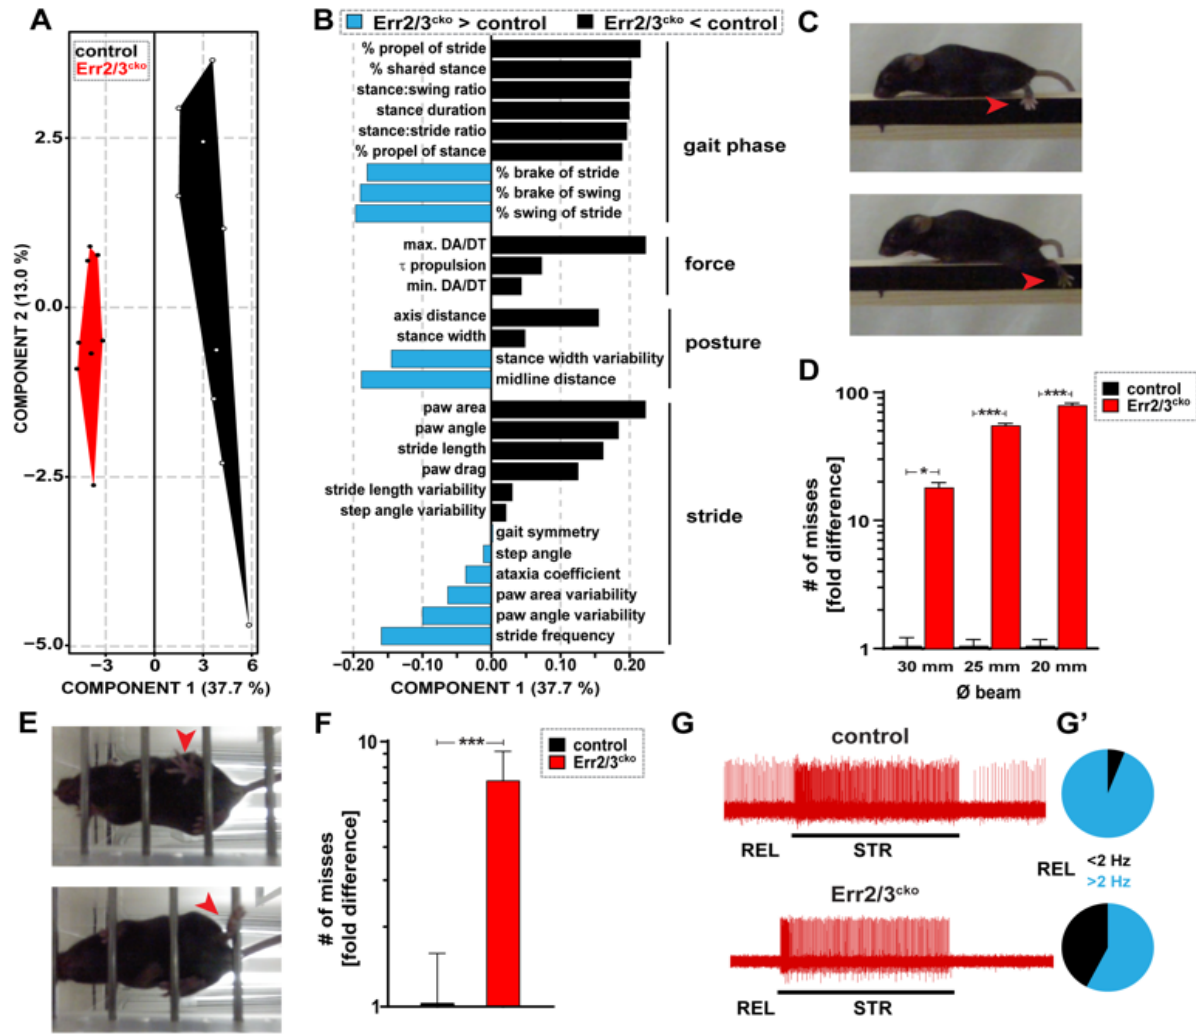

910

911 **Figure 4.** Err2/3 is required for the acquisition of gamma motor neuron-specific functional  
 912 properties and the execution of precision movements.

913 **(A, B)** **(A)** Polygon graphs based on partial least squares (PLS) analysis of 58 gait variables  
 914 measured during treadmill locomotion at 25 m·s<sup>-1</sup> reveals significant gait alterations in Err2/3<sup>cko</sup>  
 915 mice (n=8, 3 trials/animal) when compared to control mice (n=9, 3 trials/animal). Each dot  
 916 represents a single animal, polygons group animals of the same genotype, the segregation of which  
 917 along the x-axis indicate that Err2/3<sup>cko</sup> mice exhibit significant gait alterations at all speeds tested  
 918 (Err2/3<sup>cko</sup> mice, 3 trials each). **(B)** Negative (black) or positive (light blue) changes (arbitrary units)  
 919 in gait variables in Err2/3<sup>cko</sup> compared to control mice ranked by predictive value independent of  
 920 sign, including reduced stance-swing phase ratio (gait phase related), reduced propulsion velocities  
 921 (force related), decreased stance width (posture related), increased paw angle variability (stride  
 922 related). **(C)** Still images of Err2/3<sup>cko</sup> mouse navigating a horizontal beam. Red arrow: (example of a  
 923 “miss”): foot missing the beam during swing-stance transition, causing the hindlimb and animal to  
 924 slip during swing phase (red arrow in C). **(D)** Err2/3<sup>cko</sup> (18.0 ± 1.75, 55.0 ± 2.20, 79.0 ± 3.49) but  
 925 not control (1.0 ± 0.175, 1.0 ± 0.125, 1.0 ± 0.125) mice exhibit dramatically increasing erratic

926 locomotion (18, 55 and 79-fold increase in the # of misses) upon navigating horizontal beams with  
927 decreasing width 30 mm, 25 mm and 20 mm, respectively (control N=4, Err2/3<sup>cko</sup> N=4, 4-5  
928 trials/animal). **(E)** Still images of Err2/3<sup>cko</sup> mouse navigating a horizontal ladder. Examples of a  
929 “miss” (red arrow in upper panel): foot missing a rung during swing-stance transition, causing the  
930 hindlimb to slip during swing phase. Note: animals frequently attempted to compensate such misses  
931 by using the “slipped” hindlimb to push against the rung and propel itself forward (red arrow in  
932 lower panel). **(F)** Err2/3<sup>cko</sup> ( $7.12 \pm 2.06$ ) exhibit significantly more erratic locomotion (7-fold  
933 increase in the # of misses) when compared to control ( $1.0 \pm 0.55$ ) upon navigating horizontal  
934 ladder (control N=5, Err2/3<sup>cko</sup> N=5, 4-5 trials/animal). **(G)** Example traces showing Ia spindle  
935 afferent responses during resting length (REL) or stretch (STR) applied by force transducer: normal  
936 STR responses, but reduced REL firing of Ia afferents in Err2/3<sup>cko</sup> mice (N=10) when compared to  
937 control mice (N=10). **(G')** Pie charts: ratio of Ia afferents firing above or below 2 Hz at REL (total  
938 trials: control n=84, Err2/3<sup>cko</sup> n=118; control >2 Hz n=79, Err2/3<sup>cko</sup> >2 Hz n=68). Data is presented  
939 as mean  $\pm$  SEM. N= # of mice, n= # of Ia afferents. Statistically significant differences between  
940 control and Err2/3<sup>cko</sup> mice are indicated as: \*p<0.05, \*\*p<0.01, \*\*\*p<0.001, n.s.= not significant,  
941 Student’s t-test).

942

943

944

945

946

947

948

949

950

951

952

953

954

955

956

957

958

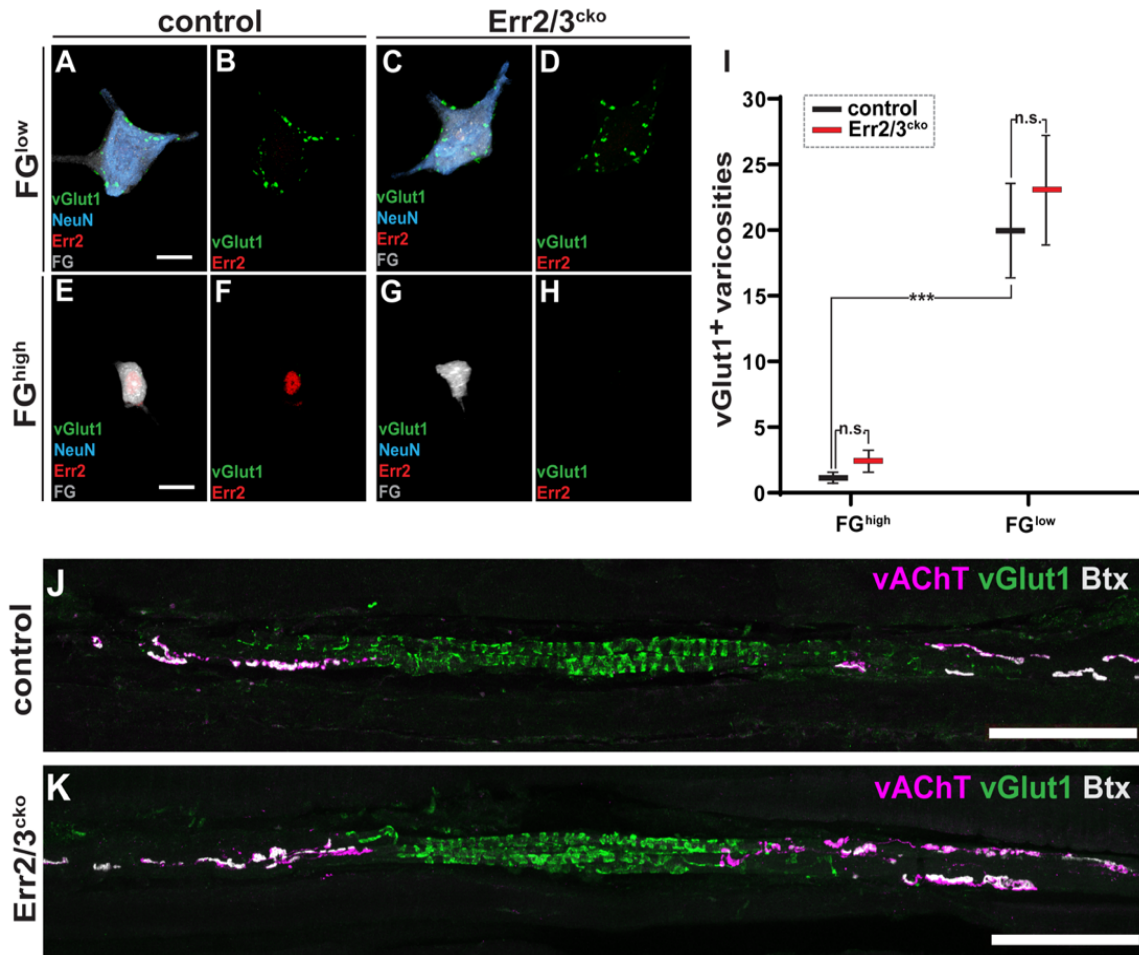

959

960 **Figure 5.** Acquisition of gamma motor neuron-specific morphology and synaptic connectivity  
 961 without Err2/3.

962 (A-I) Imaris 3D reconstruction: vGlut1<sup>+</sup> synaptic varicosities (green) associated with large FG<sup>low</sup>,  
 963 NeuN<sup>high</sup> motor neurons in control (A, B) and Err2/3<sup>cko</sup> mice (C, D) (scale bar: 20 μm). (E-H)  
 964 Absence of vGlut1<sup>+</sup> puncta on FG<sup>high</sup>, NeuN<sup>low or negligible</sup> motor neurons in control (E, F) and Err2/3<sup>cko</sup>  
 965 mice (G, H) (scale bar: 20 μm). (I) Significant difference in vGlut1<sup>+</sup> varicosities associated with  
 966 FG<sup>high</sup>, NeuN<sup>low or negligible</sup> and FG<sup>low</sup>, NeuN<sup>high</sup> motor neurons from control mice. Lack of significant  
 967 differences in vGlut1<sup>+</sup> synaptic varicosities associated with FG<sup>low</sup>, NeuN<sup>high</sup> motor neurons in control (20  
 968 ± 3.48, n=9) versus Err2/3<sup>cko</sup> mice (23.1 ± 4.06, n=10). Lack of significant differences in vGlut1<sup>+</sup>  
 969 varicosities between control FG<sup>high</sup>, NeuN<sup>low or negligible</sup> (1.1 ± 0.36, n=10) and Err2/3<sup>cko</sup> FG<sup>high</sup>,  
 970 NeuN<sup>low or negligible</sup> motor neurons (2.4 ± 0.78, n=10). (J, K) P70 mouse extensor digitorum longus  
 971 (EDL) muscle spindles of control (J) and Err2/3<sup>cko</sup> (K) mice. (J) Distribution of Ia sensory  
 972 annulospiral endings in the central spindle segment (visualized by vGlut1, green), motor innervation  
 973 (vAChT, magenta) and their postsynaptic sites (Btx, alpha bungarotoxin, grey) (scale bar: 100 μm).  
 974 (K) Normal appearance of Err2/3<sup>cko</sup> muscle spindle based on the distribution of sensory and motor  
 975 innervation (scale bar: 100 μm). Data is presented as mean ± SEM. n= # of neurons. Statistically



976 significant differences control and Err2/3<sup>cko</sup> motor neurons are indicated as: \*p<0.05, \*\*p<0.01,  
977 \*\*\*p<0.001, n.s.= not significant, Student's t-test).

978

979

980

981

982

983

984

985

986

987

988

989

990

991

992

993

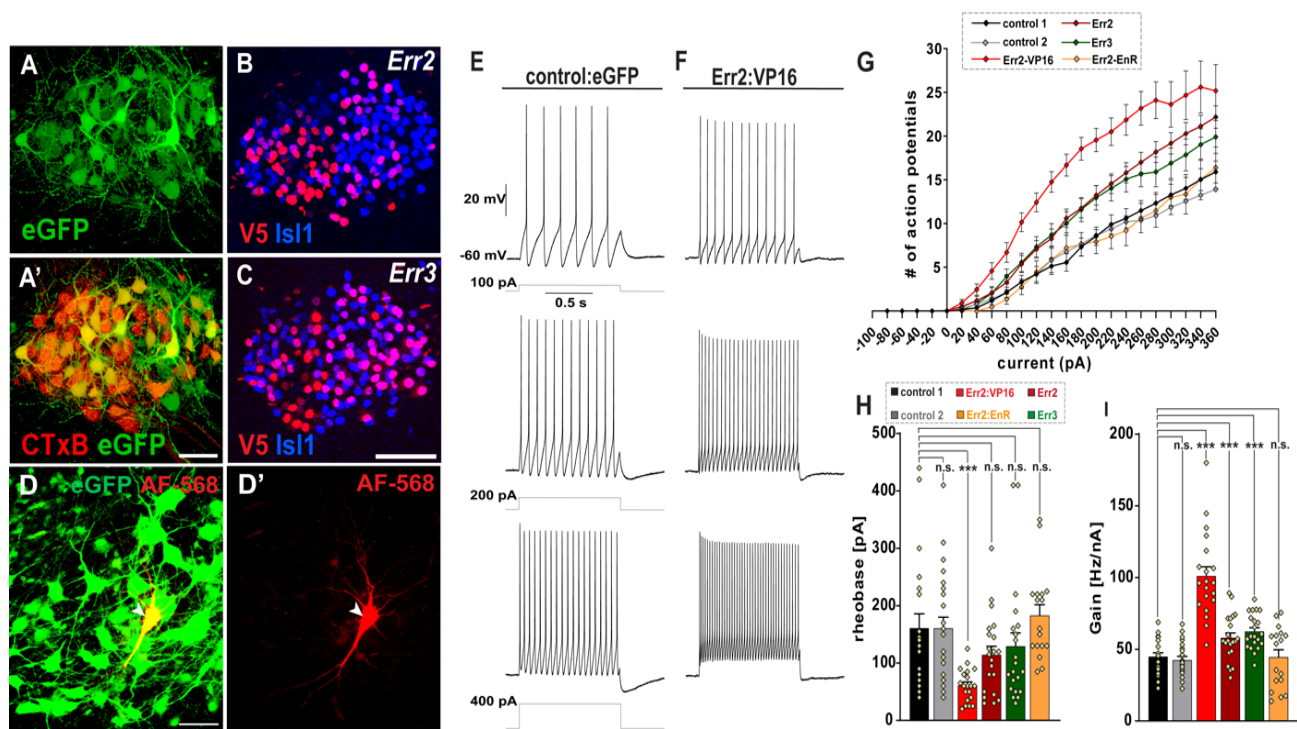

994

995 **Figure 6.** Err2/3 promote gamma motor neuron-specific functional properties through  
 996 transcriptional activation.

997 (A-D') Overview of E12 chick spinal cord: stable transfection with expression vector driving eGFP  
 998 expression (A) in ventral horn motor neurons. Higher magnification of eGFP expressing neurons  
 999 further identified as motor neurons by retrograde cholera toxin B (CTxB) tracing upon *in ovo*  
 1000 injection into the hindlimb (A') (scale bar: 100  $\mu$ m). Examples of expression and nuclear  
 1001 localization of mouse Err2 (B) and Err3 (C) in chick motor neurons (detected via N-terminal V5  
 1002 epitope tags) (scale bar: 30  $\mu$ m). eGFP<sup>+</sup> motor neuron recorded with patch pipette containing Alexa  
 1003 fluor-568 dye (red) (D and D') (scale bar: 50  $\mu$ m). (E, F) Example traces of current clamp  
 1004 recordings of chick motor neurons (in acute spinal cord slice preparations) forcedly expressing  
 1005 eGFP only (control) (E) or Err2:VP16 and eGFP (F), upon 100, 200 and 400 pA, 1s square current  
 1006 pulses: motor neurons expressing elevated Err2 levels exhibit higher firing rates and gear up their  
 1007 firing rates more rapidly in response to current pulses (F). (G) Current-action potential response  
 1008 curves for control transfected motor neurons (black, n=21). Similar leftward shifts in the slope of the  
 1009 response curve upon expressing Err2 (dark red, n=21) or Err3 (green, n=21). Exaggerated leftward  
 1010 shift in the slope of the response curve upon expressing Err2 fused to a transcriptional activation  
 1011 domain (Err2:VP16) (red, n=20), while lack of shift when expressing Err2 fused to a transcriptional  
 1012 repression domain (Err2:EnR) (orange, n=17). (H) Compared to control 1 ( $160.95 \pm 25.85$ ),  
 1013 significant decrease in rheobase was observed upon over-expression of Err2:VP16 ( $61 \pm 6.36$ ),  
 1014 while no significant change in rheobase was observed upon over-expression of Err2 ( $114.28 \pm$   
 1015  $15.10$ ), Err3 ( $129.28 \pm 23.41$ ) or Err2:EnR ( $182.94 \pm 18.81$ ). (J) Compared to control 1 ( $44.84 \pm$

1016 2.75), significant increase in gain was observed upon over-expression of Err2:VP16 ( $101.01 \pm 6.58$ ),  
1017 Err2 ( $58.00 \pm 3.49$ ), Err3 ( $62.47 \pm 2.66$ ) but not upon the forced expression of Err2:EnR ( $44.8 \pm$   
1018  $5.14$ ). No differences detected between control 1 and control 2 (n=with parameters recorded during  
1019 two different experiments at different time points upon expressing “eGFP only” control vectors,  
1020 thus demonstrating robustness of the assay. Data is presented as mean  $\pm$ SEM. n= # of neurons.  
1021 Statistically significant differences are indicated as: \* $p < 0.05$ , \*\* $p < 0.01$ , \*\*\* $p < 0.001$ , n.s.= not  
1022 significant, Student’s t-test).

1023

1024

1025

1026

1027

1028

1029

1030

1031

1032

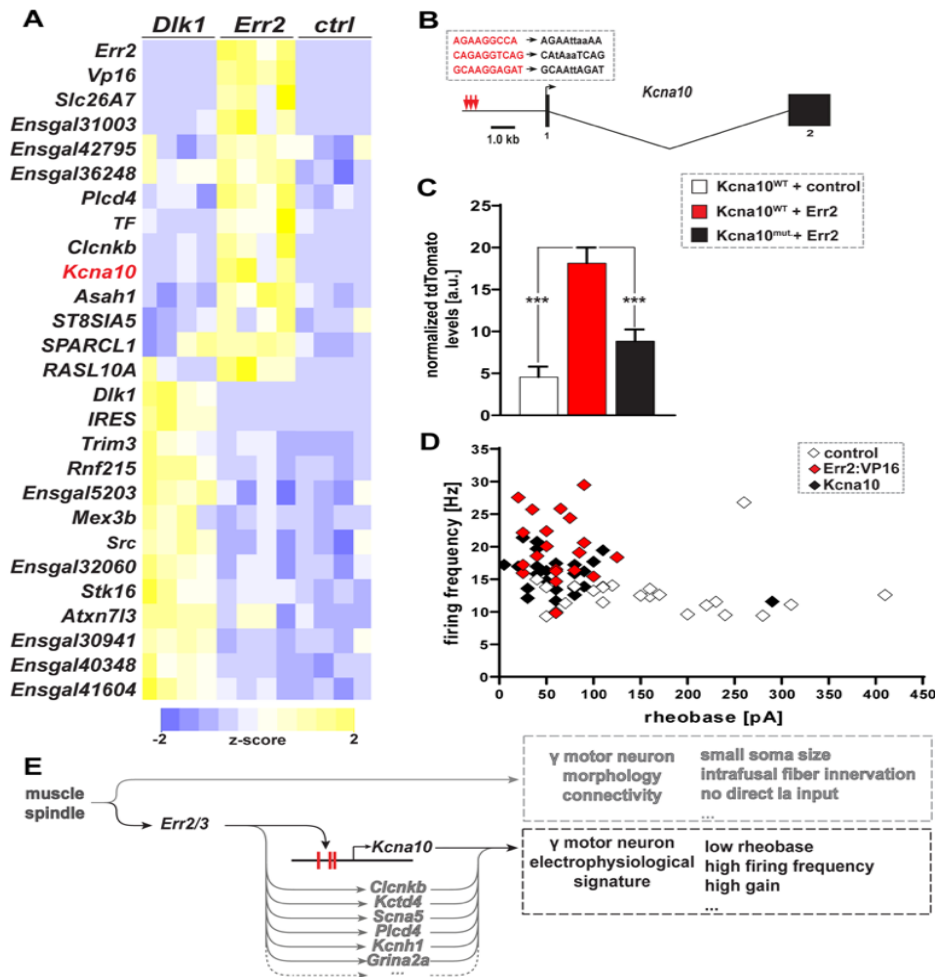

1033

1034 **Figure 7.** Err2 operates through *Kcna10* to promote a gamma motor neuron electrophysiological  
 1035 signature.

1036 (A) Heatmap based on transcript reads (transcript per million (TPM)) detected by RNA sequencing:  
 1037 Err2 (N=4) and Dlk1 (N=4) promote different gene expression signatures in chick motor neurons  
 1038 when compared to control (N=4), including *Kcna10* (red) by Err2 (only upregulated genes are  
 1039 shown). (B) *Kcna10* genomic locus: 3 clustered Err2/3 binding sites within promoter region. (C)  
 1040 Reporter tdTomato fluorescence driven by wild-type (WT) *Kcna10* promoter is boosted by Err2 co-  
 1041 transfected (18.14 ± 1.85) (red, n=102) in chick motor neurons when compared to control (4.57 ±  
 1042 1.23) (gray, n=100) and decrease in tdTomato reporter fluorescence upon mutating the Err2/3  
 1043 binding sites (8.85 ± 1.38) (black, n=101). (D) Whole cell patch-clamp recordings: forced  
 1044 Err2:VP16 expression (red, n=20) shifts chick motor neuron properties towards a gamma motor  
 1045 neuron-like electrophysiological signature (high firing rates, low rheobases) compared to control  
 1046 (white, n=23). Forced *Kcna10* (black, n=24) expression recapitulates the promotion of a gamma  
 1047 motor neuron electrophysiological signature by Err2 in chick motor neurons when compared to  
 1048 control (white, n=23) motor neurons. (E) Summary: Err2/3 bind 3 clustered binding sites within the  
 1049 *Kcna10* promoter region to drive *Kcna10* expression that promotes gamma motor neuron  
 1050 electrophysiological signature of low rheobases and high firing rates while not affecting the

1051 morphology and connectivity identities of gamma motor neurons. Data is presented as mean  $\pm$  SEM.  
1052 n= # of neurons, N= # of embryos. Statistically significant differences are indicated as: \* $p < 0.05$ ,  
1053 \*\* $p < 0.01$ , \*\*\* $p < 0.001$ , n.s.= not significant, Student's t-test).

1054

1055

1056

1057

1058

1059

1060

1061

1062
